# Supplementary material for: Electrocatalytic hydrogenation of cyanoarenes, nitroarenes, quinolines, and pyridines under mild conditions with a proton-exchange membrane reactor
Source: publisher site journal article supplement (doi:10.3762/bjoc.20.139), 2024-07-11

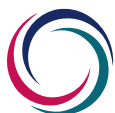

## Supporting Information

for

### **Electrocatalytic hydrogenation of cyanoarenes, nitroarenes, quinolines, and pyridines under mild conditions with a proton-exchange membrane reactor**

Koichi Mitsudo, Atsushi Osaki, Haruka Inoue, Eisuke Sato, Naoki Shida, Mahito Atobe and Seiji Suga

*Beilstein J. Org. Chem.* **2024**, *20*, 1560–1571. [doi:10.3762/bjoc.20.139](https://doi.org/10.3762/bjoc.20.139)

## Experimental part

## General

Gas chromatography (GC) analyses were performed by using a SHIMADZU gas chromatograph (GC2014s with a capillary column thickness of film: 0.25  $\mu\text{m}$ , length: 25.0 m, inner diameter: 0.22 mm (CBP1-M25-025, SHIMADZU GLC Ltd.), carrier gas: helium). Constant-current electrolysis was carried out with a DC power supply (KIKUSUI PMX350-0.2A). Nuclear magnetic resonance (NMR) spectra were recorded on JEOL JNM-ECZ600R ( $^1\text{H}$  600 MHz,  $^{13}\text{C}$  150 MHz,  $^{19}\text{F}$  565 MHz), JEOL JNM-ECS400 ( $^1\text{H}$  400 MHz,  $^{13}\text{C}$  100 MHz,  $^{19}\text{F}$  376 MHz), Varian 400-MR ASW ( $^1\text{H}$  400 MHz,  $^{13}\text{C}$  100 MHz) and Varian NMR System PS600 ( $^1\text{H}$  600 MHz,  $^{13}\text{C}$  150 MHz) spectrometers. Chemical shifts for  $^1\text{H}$  NMR are expressed in parts per million (ppm) relative to TMS ( $\delta$  0.00 ppm) or residual  $\text{CHCl}_3$  in  $\text{CDCl}_3$  ( $\delta$  7.26 ppm) or  $\text{H}_2\text{O}$  in  $\text{D}_2\text{O}$  ( $\delta$  4.79 ppm). Chemical shifts for  $^{13}\text{C}$  NMR are expressed in parts per million (ppm) relative to TMS ( $\delta$  0.00 ppm) or  $\text{CDCl}_3$  ( $\delta$  77.16 ppm) with a complete proton decoupling. Chemical shifts for  $^{19}\text{F}$  NMR are expressed in ppm relative to  $\alpha,\alpha,\alpha$ -trifluorotoluene ( $\delta$  -63.9 ppm) or hexafluorobenzene ( $\delta$  -162.9 ppm). IR spectra were recorded on a SHIMADZU IRAffinity-1 spectrophotometer. High-resolution mass spectrometry was performed on a Bruker micrOTOF II-SKA (ESI-MS). Analytic thin layer chromatography (TLC) was performed on Merck, pre-coated plate silica gel 60 F<sub>254</sub> (0.25 mm thickness). Column chromatography was performed on KANTO CHEMICAL silica gel 60N (40–50  $\mu\text{m}$ ).

## Materials

All chemicals were purchased from commercial suppliers. All chemicals were used without further purification. Stainless steel end plates and carbon separators for a PEM reactor were purchased from CHEMIX Co., Ltd. As for manufacturing the membrane electrode assembly (MEA), Nafion<sup>®</sup> perfluorinated membrane (Nafion<sup>®</sup> NR212) was purchased from Furukawa agency Co., Ltd. Nafion<sup>®</sup> perfluorinated resin solution (5 wt % in mixture of lower aliphatic and water, Nafion<sup>®</sup> DE521) as ionomer solution was purchased from Sigma-Aldrich Co. or Wako Pure Chemical Industries. Fuel cell catalysts (TEC10E50E; Pt/C, TECRU(ONLY)E30; Ru/C, TEC66E50; Pt50Ru50/C and TEC62E58; Pt33Ru67/C) were purchased from Tanaka Kikinzoku Kogyo K.K. (TKK). Pd/C was purchased from ISHIFUKU Metal Industry Co., Ltd. PtPd/C, and Ir/C were supplied by ISHIFUKU Metal Industry Co., Ltd. DSE<sup>®</sup> electrode was supplied by De Nora Permelec Ltd. Gas diffusion layer (GDL39BB) was purchased from SGL CARBON GmbH. 2,3-Dimethylquinoline (**6i**)<sup>1</sup> and 6-(trifluoromethyl)quinoline (**6t**)<sup>2</sup> were synthesized according to the literature.

## Preparation of MEAs

Fuel cell catalyst (244 mg), deionized water (1.2 g), Nafion<sup>®</sup> perfluorinated resin solution, and 1-propanol (1.4 g) were stirred in a glass vial. This mixture and zirconia balls (diameter: 3.0 mm, 10 pieces) were added to a Teflon<sup>®</sup> vessel. The vessel was placed in a planetary rotation pot mill (PULVERISETTE, Fritsch Japan Co. Ltd.) and rotated at 200 rpm for 20 min. After the rotation, catalyst dispersion was obtained. Gas diffusion electrodes (GDE, 5 cm  $\times$  5 cm) were homemade by spraying catalyst inks (Nafion<sup>®</sup>/catalysts weight ratio of 0.8:1, 1-propanol as dispersant) on commercialized GDL39BB to form a catalyst layer and then drying at 120  $^{\circ}\text{C}$ , 3 min. After spraying, the GDE sheet was cut into 1 cm  $\times$  4 cm pieces. Two sheets of this catalyst layer were used for the anode and the cathode. Nafion<sup>®</sup> perfluorinated membrane (3 cm  $\times$  10 cm) was put between the anode and the cathode, and their catalyst sides faced to the membrane. Finally, this was hot-pressed (0.4 MPa, 150  $^{\circ}\text{C}$ ) for 10 min. Pt/C was used as an anode

catalyst material and Pt/C, Pd/C, Ir/C, Ru/C, PtPd/C, and PtRu/C were used as cathode catalyst materials. The loading amount of each catalyst was 0.5 mg/cm<sup>2</sup>.

### Preparation of a PEM reactor

As shown in Figure S1, stainless steel, carbon separators, Teflon<sup>®</sup> gaskets, and MEA were used to fabricate the PEM reactor, which was tightened to 2.0 Nm with M6 size screws using a torque wrench.

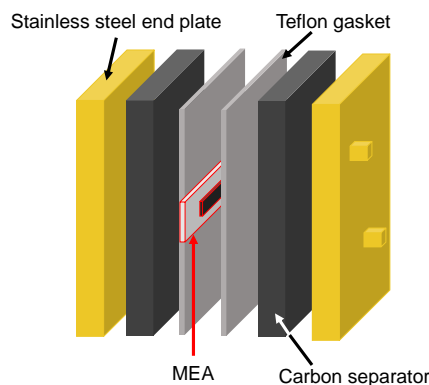

**Figure S1.** PEM reactor

### General procedure for hydrogenation of cyanoarenes and nitroarenes using a PEM reactor

Electrocatalytic hydrogenations were carried out by using a PEM reactor (Figure S2). The MEA (3 cm × 10 cm, 1 cm × 4 cm: active area) was integrated into the PEM reactor. For the cathodic chamber, humidified nitrogen gas was supplied for 1 hour. After that, the solution of substrate solution was provided by a circular pump (YAMAZEN, MSP-001-0). For the anodic chamber, humidified hydrogen gas (flow rate: 100 mL/min) was supplied. A constant current was supplied at room temperature. The yields of products were determined by GC or NMR analyses.

### General procedure for hydrogenation of quinoline (6) using a PEM reactor

Electrocatalytic hydrogenation was carried out by using a PEM reactor. The MEA (3 cm × 10 cm, 1 cm × 4 cm: active area) was integrated into the PEM reactor. For the cathodic chamber, humidified nitrogen gas was supplied for 1 hour. After that, the solution of the substrate (1.5 mmol) in CH<sub>2</sub>Cl<sub>2</sub> (3 mL) was provided with 0.75 mL/min by a circular pump (YAMAZEN, MSP-001-0). For the anodic chamber, humidified hydrogen gas (flow rate: 100 mL/min) was supplied. A constant current (25 mA/cm<sup>2</sup>, 25 F/mol, 10 h) was supplied at room temperature. To the obtained cathodic reaction solution was added NaOH aq (1.0 M, 5 mL), and the mixture was extracted with CH<sub>2</sub>Cl<sub>2</sub> (3 × 10 mL). The combined organic phase was washed with brine, dried over Na<sub>2</sub>SO<sub>4</sub>, filtered, and concentrated under reduced pressure. The residue was purified by column chromatography on silica gel eluting with hexane/EtOAc to afford 1,2,3,4-tetrahydroquinoline.

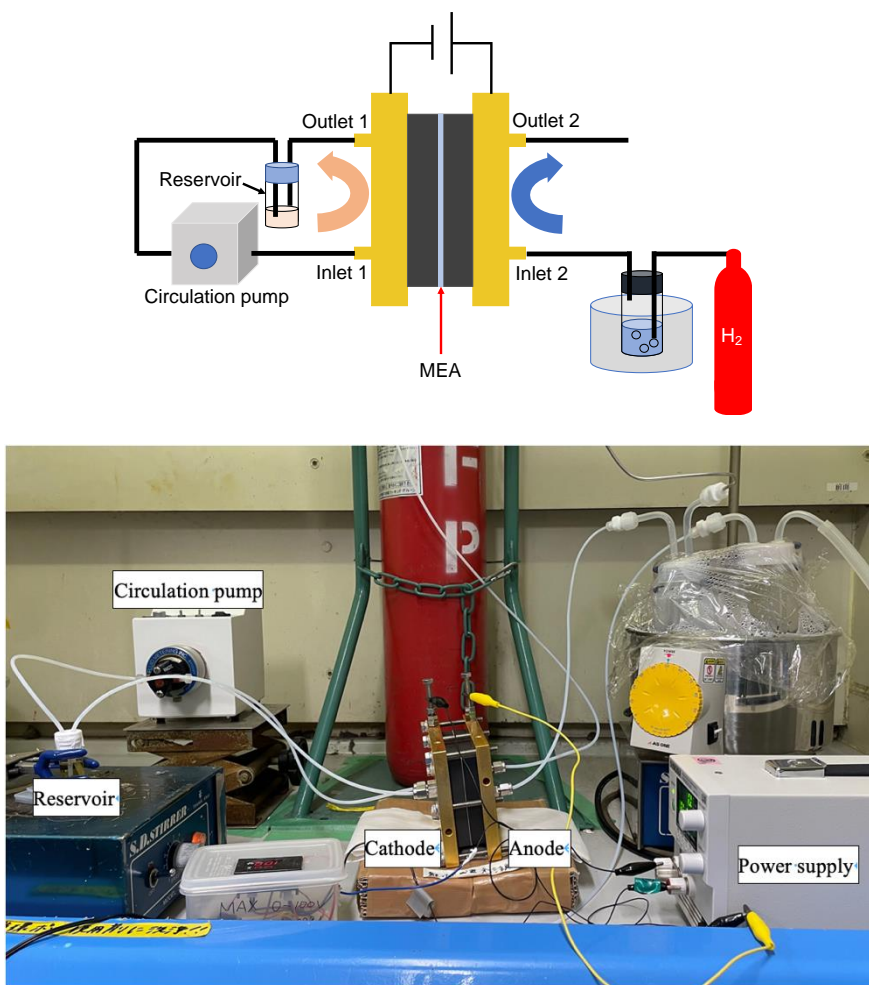

**Figure S2.** Hydrogenation system using a PEM reactor

### 1,2,3,4-Tetrahydroquinoline (7a)

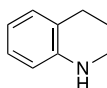

Prepared according to the general procedure from quinoline (**6a**, 194 mg, 1.50 mmol) and *p*-toluenesulfonic acid monohydrate (29 mg, 0.15 mmol) in  $\text{CH}_2\text{Cl}_2$  (3 mL). A constant current (25 mA/cm<sup>2</sup>, 25 F/mol, 10 h) was supplied at room temperature. After general work-up, the residue was purified by column chromatography on silica gel (hexane/EtOAc 2:1) to afford the title compound as yellow liquid (180 mg, 1.35 mmol, 90%). <sup>1</sup>H NMR (600 MHz,  $\text{CDCl}_3$ )  $\delta$  6.95 (td,  $J$  = 7.2, 1.0 Hz, 1H), 6.93 (d,  $J$  = 7.2 Hz, 1H), 6.59 (td,  $J$  = 7.2 Hz, 1H), 3.80 (brs, 1H), 3.29 (t,  $J$  = 6.5 Hz, 2H), 2.75 (t,  $J$  = 6.5 Hz, 2H), 1.93 (quint,  $J$  = 6.5 Hz, 2H); <sup>13</sup>C {<sup>1</sup>H} NMR (150 MHz,  $\text{CDCl}_3$ )  $\delta$  144.9, 129.6, 126.8, 121.6, 117.1, 114.3, 42.1, 27.1, 22.3; IR (neat) 3408, 2928, 2839, 2361, 1607, 1504, 1312, 1096, 1007, 746 cm<sup>-1</sup>. The spectral data were in good agreement with literature.<sup>3</sup>

### 8-Methyl-1,2,3,4-tetrahydroquinoline (7b)

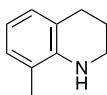

Prepared according to the general procedure from 8-methylquinoline (**6b**, 215 mg, 1.50 mmol) and *p*-toluenesulfonic acid monohydrate (28 mg, 0.15 mmol) in CH<sub>2</sub>Cl<sub>2</sub> (3 mL). A constant current (25 mA/cm<sup>2</sup>, 25 F/mol, 10 h) was supplied at room temperature. After general work-up, the residue was purified by column chromatography on silica gel (hexane/EtOAc 2:1) to afford the title compound as colorless liquid (196 mg, 1.33 mmol, 89%). <sup>1</sup>H NMR (600 MHz, CDCl<sub>3</sub>) δ 6.89 (d, *J* = 7.6 Hz, 1H), 6.86 (d, *J* = 7.6 Hz, 1H), 6.57 (td, *J* = 7.6, 1.0 Hz, 1H), 3.65 (brs, 1H), 3.38 (t, *J* = 6.2 Hz, 2H), 2.80 (t, *J* = 6.2 Hz, 2H), 2.09 (s, 3H), 1.95 (quint, *J* = 6.2 Hz, 2H); <sup>13</sup>C{<sup>1</sup>H} NMR (150 MHz, CDCl<sub>3</sub>) δ 142.8, 127.9, 127.5, 121.3, 121.0, 116.5, 42.5, 27.4, 22.3, 17.3; IR (neat) 3426, 2928, 2841, 2359, 1599, 1495, 1308, 1267, 1109, 759 cm<sup>-1</sup>. The spectral data were in good agreement with literature.<sup>4</sup>

### 7-Methyl-1,2,3,4-tetrahydroquinoline (7c)

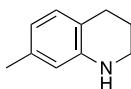

Prepared according to the general procedure from 7-methylquinoline (**6c**, 215 mg, 1.50 mmol) and *p*-toluenesulfonic acid monohydrate (28 mg, 0.15 mmol) in CH<sub>2</sub>Cl<sub>2</sub> (3 mL). A constant current (25 mA/cm<sup>2</sup>, 25 F/mol, 10 h) was supplied at room temperature. After general work-up, the residue was purified by column chromatography on silica gel (hexane/EtOAc 2:1) to afford the title compound as colorless liquid (198 mg, 1.35 mmol, 90%). <sup>1</sup>H NMR (600 MHz, CDCl<sub>3</sub>) δ 6.89 (d, *J* = 7.6 Hz, 1H), 6.86 (d, *J* = 7.6 Hz, 1H), 6.57 (td, *J* = 7.6, 1.0 Hz, 1H), 3.65 (brs, 1H), 3.38 (t, *J* = 6.2 Hz, 2H), 2.80 (t, *J* = 6.2 Hz, 2H), 2.09 (s, 3H), 1.95 (quint, *J* = 6.2 Hz, 2H); <sup>13</sup>C{<sup>1</sup>H} NMR (150 MHz, CDCl<sub>3</sub>) δ 142.8, 127.9, 127.5, 121.3, 121.0, 116.5, 42.5, 27.4, 22.3, 17.3; IR (neat) 3426, 2928, 2841, 2359, 1599, 1495, 1308, 1267, 1109, 759 cm<sup>-1</sup>. The spectral data were in good agreement with literature.<sup>4</sup>

### 6-Methyl-1,2,3,4-tetrahydroquinoline (7d)

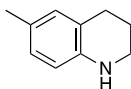

Prepared according to the general procedure from 6-methylquinoline (**6d**, 214 mg, 1.50 mmol) and *p*-toluenesulfonic acid monohydrate (29 mg, 0.15 mmol) in CH<sub>2</sub>Cl<sub>2</sub> (3 mL). A constant current (25 mA/cm<sup>2</sup>, 25 F/mol, 10 h) was supplied at room temperature. After general work-up, the residue was purified by column chromatography on silica gel (hexane/EtOAc 2:1) to afford the title compound as colorless solid (187 mg, 1.27 mmol, 85%). <sup>1</sup>H NMR (600 MHz, CDCl<sub>3</sub>) δ 6.78–6.77 (m, 2H), 6.41–6.40 (m, 1H), 3.27 (t, *J* = 5.5 Hz, 2H), 2.73 (t, *J* = 6.5 Hz, 2H), 2.20 (s, 3H), 1.92 (tt, *J* = 6.5, 5.5 Hz, 2H); <sup>13</sup>C{<sup>1</sup>H} NMR (150 MHz, CDCl<sub>3</sub>) δ 142.5, 130.2, 127.4, 126.4, 121.7, 114.6, 42.3, 27.0, 22.5, 20.5; IR (KBr) 3364, 2911, 2837, 1616, 1512, 1350, 1306, 1260, 810, 635 cm<sup>-1</sup>. The spectral data were in good agreement with literature.<sup>3</sup>

### 5-Methyl-1,2,3,4-tetrahydroquinoline (7e)

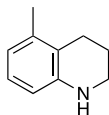

Prepared according to the general procedure from 5-methylquinoline (**6e**, 215 mg, 1.50 mmol) and *p*-toluenesulfonic acid monohydrate (29 mg, 0.15 mmol) in CH<sub>2</sub>Cl<sub>2</sub> (3 mL). A constant current (25 mA/cm<sup>2</sup>, 25 F/mol, 10 h) was supplied at room temperature. After general work-up, the residue was purified by column chromatography on silica gel (hexane/EtOAc 2:1) to afford the title compound as colorless liquid (192 mg, 1.30 mmol, 87%). <sup>1</sup>H NMR (600 MHz, CDCl<sub>3</sub>) δ 6.89 (t, *J* = 7.3 Hz, 1H), 6.52 (d, *J* = 7.3 Hz, 1H), 6.38 (d, *J* = 7.3 Hz, 1H), 3.78 (brs, 1H), 3.26 (t, *J* = 5.5 Hz, 2H), 2.65 (t, *J* = 5.5 Hz, 2H), 2.18 (s, 3H), 1.99 (quint, *J* = 5.5 Hz, 2H); <sup>13</sup>C{<sup>1</sup>H} NMR (150 MHz, CDCl<sub>3</sub>) δ 145.1, 137.4, 126.3, 120.4, 119.1, 112.6, 41.7, 24.2, 22.7, 19.5; IR (neat) 3401, 3046, 2941, 1589, 1348, 1306, 1269, 1113, 768, 714 cm<sup>-1</sup>. The spectral data were in good agreement with literature.<sup>4</sup>

### 3-Methyl-1,2,3,4-tetrahydroquinoline (7g)

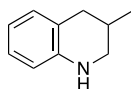

Prepared according to the general procedure from 3-methylquinoline (**6g**, 215 mg, 1.50 mmol) and *p*-toluenesulfonic acid monohydrate (29 mg, 0.15 mmol) in CH<sub>2</sub>Cl<sub>2</sub> (3 mL). A constant current (25 mA/cm<sup>2</sup>, 25 F/mol, 10 h) was supplied at room temperature. After general work-up, the residue was purified by column chromatography on silica gel (hexane/EtOAc 2:1) to afford the title compound as colorless liquid (188 mg, 1.28 mmol, 85%). <sup>1</sup>H NMR (600 MHz, CDCl<sub>3</sub>) δ 6.96 (t, *J* = 7.4 Hz, 1H), 6.94 (d, *J* = 7.4 Hz, 1H), 6.60 (td, *J* = 7.4, 0.9 Hz, 1H), 6.48 (d, *J* = 7.4 Hz, 1H), 3.45 (brs, 1H), 3.27 (ddd, *J* = 10.6, 3.7, 1.8 Hz, 1H), 2.89 (t, *J* = 10.6 Hz, 1H), 2.77 (dd, *J* = 16.1, 5.0 Hz, 1H), 2.43 (dd, *J* = 16.1, 10.6 Hz, 1H), 2.10–2.02 (m, 1H), 1.05 (d, *J* = 6.9 Hz, 3H); <sup>13</sup>C{<sup>1</sup>H} NMR (150 MHz, CDCl<sub>3</sub>) δ 144.3, 129.4, 126.6, 120.9, 116.7, 113.8, 48.7, 35.4, 27.1, 19.0; IR (neat) 3410, 2955, 2832, 1607, 1504, 1371, 1273, 1153, 835, 746 cm<sup>-1</sup>. The spectral data were in good agreement with literature.<sup>4</sup>

### 2-Methyl-1,2,3,4-tetrahydroquinoline (7h)

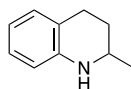

Prepared according to the general procedure from 2-methylquinoline (**6h**, 215 mg, 1.50 mmol) and *p*-toluenesulfonic acid monohydrate (29 mg, 0.15 mmol) in CH<sub>2</sub>Cl<sub>2</sub> (3 mL). A constant current (25 mA/cm<sup>2</sup>, 25 F/mol, 10 h) was supplied at room temperature. After general work-up, the residue was purified by column chromatography on silica gel (hexane/EtOAc 2:1) to afford the title compound as colorless liquid (189 mg, 1.28 mmol, 85%). <sup>1</sup>H NMR (600 MHz, CDCl<sub>3</sub>) δ 6.98–6.96 (m, 2H), 6.61 (td, *J* = 7.4, 1.4 Hz, 1H), 6.48 (dd, *J* = 7.4, 1.4 Hz, 1H), 3.40 (dq, *J* = 10.0, 6.2, 3.4 Hz, 1H), 2.85 (ddd, *J* = 16.2, 11.7, 5.2 Hz, 1H), 2.74 (ddd, *J* = 16.2, 5.2, 3.4 Hz, 1H), 1.94 (ddt, *J* = 12.5, 5.2, 3.4 Hz, 1H), 1.60 (dddd, *J* = 12.5, 11.7, 10.0, 5.2 Hz, 1H), 1.21 (d, *J* = 6.2 Hz, 3H); <sup>13</sup>C{<sup>1</sup>H} NMR (150 MHz, CDCl<sub>3</sub>) δ 144.7, 129.2, 126.6, 120.9, 116.8, 114.0, 46.9, 30.1, 26.5, 22.5; IR (neat) 3393, 2843,

1609, 1487, 1377, 1310, 1258, 1153, 1124, 746  $\text{cm}^{-1}$ . The spectral data were in good agreement with literature.<sup>3</sup>

### 2,3-Dimethyl-1,2,3,4-tetrahydroquinoline (7i)

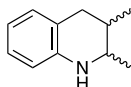

Prepared according to the general procedure from 2,3-dimethylquinoline (**6i**, 235 mg, 1.49 mmol) and *p*-toluenesulfonic acid monohydrate (28 mg, 0.15 mmol) in  $\text{CH}_2\text{Cl}_2$  (3 mL). A constant current (25 mA/ $\text{cm}^2$ , 25 F/mol, 10 h) was supplied at room temperature. After general work-up, the residue was purified by column chromatography on silica gel (hexane/EtOAc 2:1) to afford the title compound as yellow liquid (185 mg, 1.15 mmol, 77%).  $^1\text{H}$  NMR (600 MHz,  $\text{CDCl}_3$ )  $\delta$  6.98 (t,  $J$  = 7.8 Hz, 1H), 6.97 (dd,  $J$  = 7.8, 3.2 Hz, 1H), 6.63–6.60 (m, 1H), 6.48 (d,  $J$  = 7.8 Hz, 1H), 3.69 (brs, 1H), 3.47 (qd,  $J$  = 6.4, 3.2 Hz, 1H, *cis* isomer), 3.04–3.00 (m, 1H, *trans* isomer), 2.92 (dd,  $J$  = 16.1, 5.0 Hz, 1H, *cis* isomer), 2.74 (dd,  $J$  = 16.1, 5.0 Hz, 1H, *trans* isomer), 2.50 (dd,  $J$  = 16.5, 6.7 Hz, 1H), 2.08–2.02 (m, 1H, *cis* isomer), 1.68–1.60 (m, 1H, *trans* isomer), 1.21 (d,  $J$  = 6.4 Hz, 3H, *trans* isomer), 1.13 (d,  $J$  = 6.4 Hz, 3H, *cis* isomer), 1.04 (d,  $J$  = 6.4 Hz, 3H, *trans* isomer), 0.95 (d,  $J$  = 6.4 Hz, 3H, *cis* isomer);  $^{13}\text{C}\{^1\text{H}\}$  NMR (150 MHz,  $\text{CDCl}_3$ )  $\delta$  144.6, 144.0, 129.9, 129.2, 126.8, 126.7, 121.5, 120.2, 117.0, 116.9, 114.0, 113.5, 53.4, 50.0, 35.6, 33.9, 33.6, 30.6, 20.9, 18.4, 18.2, 14.5; IR (neat) 3397, 2968, 2899, 2837, 1609, 1381, 1314, 1279, 1155, 748  $\text{cm}^{-1}$ . The spectral data were in good agreement with literature.<sup>5</sup>

### 2-Phenyl-1,2,3,4-tetrahydroquinoline (7j)

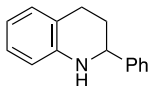

Prepared according to the general procedure from 2-phenylquinoline (**6j**, 308 mg, 1.50 mmol) and *p*-toluenesulfonic acid monohydrate (28 mg, 0.15 mmol) in  $\text{CH}_2\text{Cl}_2$  (3 mL). A constant current (25 mA/ $\text{cm}^2$ , 25 F/mol, 10 h) was supplied at room temperature. After general work-up, the residue was purified by column chromatography on silica gel (hexane/EtOAc 2:1) to afford the title compound as colorless oil (256 mg, 1.22 mmol, 81%).  $^1\text{H}$  NMR (600 MHz,  $\text{CDCl}_3$ )  $\delta$  7.39 (d,  $J$  = 6.9 Hz, 2H), 7.35 (t,  $J$  = 6.9 Hz, 2H), 7.28 (t,  $J$  = 6.9 Hz, 1H), 7.01 (t,  $J$  = 7.6 Hz, 1H), 7.00 (d,  $J$  = 7.6 Hz, 1H), 6.65 (t,  $J$  = 7.6 Hz, 1H), 6.54 (d,  $J$  = 7.6 Hz, 1H), 4.43 (dd,  $J$  = 10.7, 5.5 Hz, 1H), 4.03 (brs, 1H), 2.92 (ddd,  $J$  = 16.5, 10.7, 5.5 Hz, 1H), 2.73 (dt,  $J$  = 16.5, 5.5 Hz, 1H), 2.14–2.10 (m, 1H), 2.02–1.96 (m, 1H);  $^{13}\text{C}\{^1\text{H}\}$  NMR (150 MHz,  $\text{CDCl}_3$ )  $\delta$  144.9, 144.8, 129.4, 128.6, 127.5, 127.0, 126.6, 120.9, 117.2, 114.1, 56.3, 31.0, 26.4; IR (neat) 3406, 3383, 3015, 2945, 2926, 2841, 1113, 926, 758, 700  $\text{cm}^{-1}$ . The spectral data were in good agreement with literature.<sup>3</sup>

### 6-Acetyl-1,2,3,4-tetrahydroquinoline (7k)

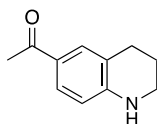

Prepared according to the general procedure from 6-acetylquinoline (**6k**, 256 mg, 1.50 mmol) and *p*-toluenesulfonic acid monohydrate (28 mg, 0.15 mmol) in CH<sub>2</sub>Cl<sub>2</sub> (12 mL). A constant current (25 mA/cm<sup>2</sup>, 25 F/mol, 10 h) was supplied at room temperature. After general work-up, the residue was purified by column chromatography on silica gel (hexane/EtOAc 2:1) to afford the title compound as colorless solid (210 mg, 1.20 mmol, 80%). <sup>1</sup>H NMR (600 MHz, CDCl<sub>3</sub>) δ 7.62–7.60 (m, 2H), 6.40 (dd, *J* = 6.4, 2.8 Hz 1H), 4.40 (brs, 1H), 3.37 (td, *J* = 6.0, 2.8 Hz 2H), 2.78 (t, *J* = 6.0 Hz, 2H), 2.45 (s, 3H), 1.94 (quint, *J* = 6.0 Hz, 2H); <sup>13</sup>C{<sup>1</sup>H} NMR (150 MHz, CDCl<sub>3</sub>) δ 196.4, 149.1, 1330.5, 128.6, 126.1, 119.8, 112.5, 41.7, 27.0, 26.0, 21.4; IR (KBr) 3339, 1647, 1580, 1533, 1435, 1319, 1290, 1236, 1146, 827 cm<sup>-1</sup>; HRMS (ESI) *m/z* calcd for C<sub>11</sub>H<sub>13</sub>NNaO [M + Na]<sup>+</sup> 198.0889, found 198.0880; mp 101.5–102.9 °C.

### Methyl 1,2,3,4-tetrahydroquinoline-6-carboxylate (**7l**)

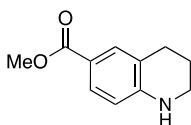

Prepared according to the general procedure from methyl quinoline-6-carboxylate (**6l**, 281 mg, 1.50 mmol) and *p*-toluenesulfonic acid monohydrate (29 mg, 0.15 mmol) in CH<sub>2</sub>Cl<sub>2</sub> (6 mL). A constant current (25 mA/cm<sup>2</sup>, 25 F/mol, 10 h) was supplied at room temperature. After general work-up, the residue was purified by column chromatography on silica gel (hexane/EtOAc 2:1) to afford the title compound as colorless solid (141 mg, 0.74 mmol, 49%). <sup>1</sup>H NMR (600 MHz, CDCl<sub>3</sub>) δ 7.65–7.64 (m, 2H), 6.40–6.38 (m, 1H), 4.30 (brs, 1H), 3.83 (s, 3H), 3.36 (t, *J* = 6.2 Hz, 2H), 2.77 (t, *J* = 6.2 Hz, 2H), 1.93 (quint, *J* = 6.2 Hz, 2H); <sup>13</sup>C{<sup>1</sup>H} NMR (150 MHz, CDCl<sub>3</sub>) δ 167.6, 148.1, 131.5, 129.2, 120.7, 118.3, 113.4, 51.7, 41.9, 26.9, 21.4; IR (KBr) 3381, 2943, 1682, 1605, 1531, 1441, 1325, 1288, 1234, 1144 cm<sup>-1</sup>. The spectral data were in good agreement with literature.<sup>4</sup>

### 1,2,3,4-Tetrahydroquinoline-6-carboxamide (**7m**)

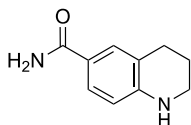

Prepared according to the general procedure from methyl quinoline-6-carboxamide (**6m**, 258 mg, 1.50 mmol) and *p*-toluenesulfonic acid monohydrate (29 mg, 0.15 mmol) in 1,4-dioxane/H<sub>2</sub>O 7:1 (6 mL). A constant current (25 mA/cm<sup>2</sup>, 25 F/mol, 10 h) was supplied at room temperature. After general work-up, the residue was purified by column chromatography on silica gel (EtOAc) to afford the title compound as colorless solid (230 mg, 1.31 mmol, 87%). <sup>1</sup>H NMR (600 MHz, CDCl<sub>3</sub>) δ 7.46–7.46 (m, 1H), 7.41 (dd, *J* = 8.3, 2.1 Hz 1H), 6.41 (d, *J* = 8.3 Hz 1H), 4.26 (brs, 1H), 3.35 (td, *J* = 6.2, 2.4 Hz 2H), 2.78 (t, *J* = 6.2 Hz, 2H), 1.93 (quint, *J* = 6.2 Hz, 2H); <sup>13</sup>C{<sup>1</sup>H} NMR (150 MHz, CDCl<sub>3</sub>) δ 196.6, 148.2, 129.5, 126.8, 120.6, 120.4, 112.9, 41.9, 27.1, 21.6; IR (KBr) 3343, 2943, 2839, 1647, 1611, 1523, 1437, 1387, 1317, 772 cm<sup>-1</sup>. The spectral data were in good agreement with literature.<sup>6</sup>

### 6-(Trifluoromethyl)-1,2,3,4-tetrahydroquinoline (7n)

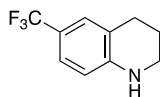

Prepared according to the general procedure from methyl 6-(trifluoromethyl)quinoline (**6n**, 296 mg, 1.50 mmol) and *p*-toluenesulfonic acid monohydrate (30 mg, 0.16 mmol) in CH<sub>2</sub>Cl<sub>2</sub> (3 mL). A constant current (25 mA/cm<sup>2</sup>, 25 F/mol, 10 h) was supplied at room temperature. After general work-up, the residue was purified by column chromatography on silica gel (hexane/EtOAc 2:1) to afford the title compound as colorless liquid (244 mg, 1.21 mmol, 81%). <sup>1</sup>H NMR (600 MHz, CDCl<sub>3</sub>) δ 7.17 (d, *J* = 7.9 Hz, 1H), 7.17 (s, 1H), 6.44 (d, *J* = 7.9 Hz, 1H), 4.15 (brs, 1H), 3.34 (t, *J* = 6.5 Hz, 2H), 2.77 (t, *J* = 6.5 Hz, 2H), 1.96–1.92 (m, 2H); <sup>13</sup>C{<sup>1</sup>H} NMR (150 MHz, CDCl<sub>3</sub>) δ 147.5, 126.5 (q, <sup>3</sup>*J*<sub>C-F</sub> = 4.3 Hz), 125.3 (q, <sup>1</sup>*J*<sub>C-F</sub> = 270.2 Hz), 124.1 (q, <sup>3</sup>*J*<sub>C-F</sub> = 4.3 Hz), 120.1, 117.9 (q, <sup>2</sup>*J*<sub>C-F</sub> = 31.8 Hz), 113.1, 41.7, 27.0, 21.5; <sup>19</sup>F NMR (565 MHz, CDCl<sub>3</sub>) δ –62.1; IR (neat) 3422, 2957, 2936, 2843, 1620, 1526, 1331, 1246, 1099, 816 cm<sup>–1</sup>. The spectral data were in good agreement with literature.<sup>7</sup>

### 8-Methoxy-1,2,3,4-tetrahydroquinoline (7o)

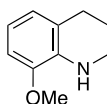

Prepared according to the general procedure from 8-methoxyquinoline (**6o**, 238 mg, 1.49 mmol) and *p*-toluenesulfonic acid monohydrate (28 mg, 0.15 mmol) in CH<sub>2</sub>Cl<sub>2</sub> (3 mL). A constant current (25 mA/cm<sup>2</sup>, 25 F/mol, 10 h) was supplied at room temperature. After general work-up, the residue was purified by column chromatography on silica gel (hexane/EtOAc 2:1) to afford the title compound as colorless liquid (214 mg, 1.31 mmol, 88%). <sup>1</sup>H NMR (600 MHz, CDCl<sub>3</sub>) δ 6.63–6.61 (m, 2H), 6.57 (td, *J* = 8.3, 0.9 Hz, 1H), 4.23 (brs, 1H), 3.83 (s, 3H), 3.34 (t, *J* = 6.0 Hz, 2H), 2.78 (t, *J* = 6.0 Hz, 2H), 1.96 (quint, *J* = 6.0 Hz, 2H); <sup>13</sup>C{<sup>1</sup>H} NMR (150 MHz, CDCl<sub>3</sub>) δ 146.4, 134.6, 121.8, 121.5, 115.8, 107.5, 55.5, 41.6, 26.8, 22.2; IR (neat) 3418, 2947, 2833, 1612, 1587, 1331, 1248, 1267, 1192, 1105 cm<sup>–1</sup>. The spectral data were in good agreement with literature.<sup>4</sup>

### 6-Methoxy-1,2,3,4-tetrahydroquinoline (7p)

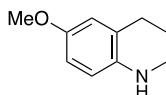

Prepared according to the general procedure from 6-methoxyquinoline (**6p**, 239 mg, 1.50 mmol) and *p*-toluenesulfonic acid monohydrate (28 mg, 0.15 mmol) in CH<sub>2</sub>Cl<sub>2</sub> (3 mL). A constant current (25 mA/cm<sup>2</sup>, 25 F/mol, 10 h) was supplied at room temperature. After general work-up, the residue was purified by column chromatography on silica gel (hexane/EtOAc 2:1) to afford the title compound as colorless solid (3 mg, 0.02 mmol, 1%). <sup>1</sup>H NMR (600 MHz, CDCl<sub>3</sub>) δ 6.59 (dd, *J* = 8.6, 3.1 Hz, 1H), 6.56 (d, *J* = 3.1 Hz, 1H), 6.46 (d, *J* = 8.6 Hz, 1H), 3.73 (s, 3H), 3.25 (t, *J* = 5.5 Hz, 2H), 2.75 (t, *J* = 6.5 Hz, 2H), 1.93 (tt, *J* = 6.5, 5.5 Hz, 2H); <sup>13</sup>C{<sup>1</sup>H} NMR (150 MHz, CDCl<sub>3</sub>) δ 152.0, 138.9, 123.1, 115.8, 115.0, 113.0, 55.9, 42.5, 27.3, 22.5; IR (KBr) 3367, 2361, 2332, 1506, 1298, 1254, 1233,

1152, 1040, 810  $\text{cm}^{-1}$ . The spectral data were in good agreement with literature.<sup>3</sup>

### 3-Methoxy-1,2,3,4-tetrahydroquinoline (7q)

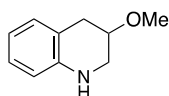

Prepared according to the general procedure from 3-methoxyquinoline (**6q**, 238 mg, 1.49 mmol) and *p*-toluenesulfonic acid monohydrate (28 mg, 0.15 mmol) in  $\text{CH}_2\text{Cl}_2$  (3 mL). A constant current (25  $\text{mA}/\text{cm}^2$ , 25 F/mol, 10 h) was supplied at room temperature. After general work-up, the residue was purified by column chromatography on silica gel (hexane/EtOAc 2:1) to afford the title compound as yellow liquid (37 mg, 0.23 mmol, 15%).  $^1\text{H}$  NMR (600 MHz,  $\text{CDCl}_3$ )  $\delta$  6.99–6.97 (m, 2H), 6.64 (td,  $J = 7.5, 1.2$  Hz 1H), 6.51 (d,  $J = 7.5$  Hz 1H), 3.76 (dddd,  $J = 10.6, 6.9, 4.1, 3.2$  Hz 1H), 3.45 (s, 3H), 3.43 (dd,  $J = 3.2, 1.4$  Hz 1H), 3.22 (ddd,  $J = 10.6, 6.9, 1.4$  Hz 1H), 3.03 (dd,  $J = 15.8, 4.1$  Hz 1H), 2.81 (dd,  $J = 15.8, 6.9$  Hz 1H);  $^{13}\text{C}\{^1\text{H}\}$  NMR (150 MHz,  $\text{CDCl}_3$ )  $\delta$  143.9, 130.2, 127.2, 119.1, 117.8, 114.2, 72.9, 56.4, 45.3, 32.8; IR (neat) 3383, 2826, 2359, 1607, 1585, 1285, 1200, 1096, 984, 748  $\text{cm}^{-1}$ ; HRMS (ESI)  $m/z$  calcd for  $\text{C}_{11}\text{H}_{13}\text{NNaO}$  [ $\text{M} + \text{Na}$ ] $^+$  186.0889, found 186.0887.

### 4-Methoxy-5,6,7,8-tetrahydroquinoline (7r')

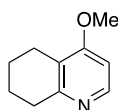

Prepared according to the general procedure from 4-methoxyquinoline (**6r**, 239 mg, 1.50 mmol) and *p*-toluenesulfonic acid monohydrate (29 mg, 0.15 mmol) in  $\text{CH}_2\text{Cl}_2$  (3 mL). A constant current (25  $\text{mA}/\text{cm}^2$ , 25 F/mol, 10 h) was supplied at room temperature. After general work-up, the residue was purified by column chromatography on silica gel (hexane/EtOAc 2:1) to afford the title compound as yellow liquid (11 mg, 0.07 mmol, 5%).  $^1\text{H}$  NMR (600 MHz,  $\text{CDCl}_3$ )  $\delta$  8.25 (d,  $J = 6.0$  Hz, 1H), 6.58 (d,  $J = 6.0$  Hz, 1H), 3.84 (s, 3H), 2.86 (t,  $J = 6.0$  Hz, 2H), 2.61 (t,  $J = 6.0$  Hz, 2H), 1.86–1.75 (m, 4H);  $^{13}\text{C}\{^1\text{H}\}$  NMR (150 MHz,  $\text{CDCl}_3$ )  $\delta$  163.6, 157.9, 148.0, 121.3, 103.3, 55.3, 32.6, 22.9, 22.34, 22.30; IR (neat) 3383, 3308, 2938, 1576, 1337, 1290, 1111, 1090, 997, 810  $\text{cm}^{-1}$ . The spectral data were in good agreement with literature.<sup>8</sup>

### 6-Fluoro-1,2,3,4-tetrahydroquinoline (7s)

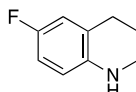

Prepared according to the general procedure from 6-fluoroquinoline (**6s**, 221 mg, 1.50 mmol) and *p*-toluenesulfonic acid monohydrate (29 mg, 0.15 mmol) in  $\text{CH}_2\text{Cl}_2$  (3 mL). A constant current (25  $\text{mA}/\text{cm}^2$ , 25 F/mol, 10 h) was supplied at room temperature. After general work-up, the residue was purified by column chromatography

on silica gel (hexane/EtOAc 2:1) to afford the title compound as yellow liquid (203 mg, 1.34 mmol, 89%).  $^1\text{H}$  NMR (600 MHz,  $\text{CDCl}_3$ )  $\delta$  6.70–6.66 (m, 2H), 6.40 (dd,  $J = 9.4, 5.0$  Hz, 1H), 3.66 (brs, 1H), 3.27 (t,  $J = 5.5$  Hz, 2H), 2.74 (t,  $J = 5.5$  Hz, 2H), 1.92 (quint,  $J = 5.5$  Hz, 2H);  $^{13}\text{C}\{^1\text{H}\}$  NMR (150 MHz,  $\text{CDCl}_3$ )  $\delta$  155.6 (d,  $^1J_{\text{C-F}} = 234.1$  Hz), 141.0, 122.9 (d,  $^4J_{\text{C-F}} = 5.8$  Hz), 115.7 (d,  $^2J_{\text{C-F}} = 21.7$  Hz), 115.0 (d,  $^3J_{\text{C-F}} = 7.2$  Hz), 113.3 (d,  $^2J_{\text{C-F}} = 21.7$  Hz), 42.2, 27.1, 22.1;  $^{19}\text{F}$  NMR (565 MHz,  $\text{CDCl}_3$ )  $\delta$  -129.6; IR (KBr) 3385, 2363, 1508, 1306, 1248, 1221, 1140, 926, 887, 772  $\text{cm}^{-1}$ . The spectral data were in good agreement with literature.<sup>9</sup>

### 6-Chloro-1,2,3,4-tetrahydroquinoline (7t)

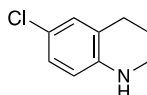

Prepared according to the general procedure from 6-chloroquinoline (**6t**, 246 mg, 1.50 mmol) and *p*-toluenesulfonic acid monohydrate (29 mg, 0.15 mmol) in  $\text{CH}_2\text{Cl}_2$  (3 mL). A constant current (25 mA/ $\text{cm}^2$ , 25 F/mol, 10 h) was supplied at room temperature. After general work-up, the residue was purified by column chromatography on silica gel (hexane/EtOAc 2:1) to afford the title compound as colorless liquid (202 mg, 1.21 mmol, 80%).  $^1\text{H}$  NMR (600 MHz,  $\text{CDCl}_3$ )  $\delta$  6.91–6.89 (m, 2H), 6.38 (d,  $J = 8.3$  Hz, 1H), 3.81 (brs, 1H), 3.28 (t,  $J = 6.4$  Hz, 2H), 2.72 (t,  $J = 6.4$  Hz, 2H), 1.91 (quint,  $J = 6.4$  Hz, 2H);  $^{13}\text{C}\{^1\text{H}\}$  NMR (150 MHz,  $\text{CDCl}_3$ )  $\delta$  143.4, 129.2, 126.6, 123.0, 121.3, 115.2, 42.0, 27.0, 21.9; IR (neat) 3418, 2841, 1603, 1497, 1470, 1352, 1300, 1269, 1184, 806  $\text{cm}^{-1}$ . The spectral data were in good agreement with literature.<sup>3</sup>

**Table S1.** Effect of current density on the electrocatalytic reduction of **6a** using a PEM reactor

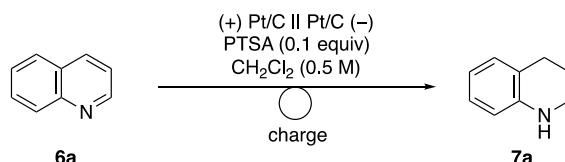

Experimental conditions: cell temperature, rt; current density; flow rate of solution, 0.75 mL/min; flow rate of hydrogen, 100 mL/min.

| entry       | current density<br>(mA/ $\text{cm}^2$ ) | charge<br>(F/mol) | yield of <b>7a</b><br>(%) <sup>a</sup> | recov. of <b>6a</b><br>(%) <sup>a</sup> | current efficiency<br>(%) <sup>a</sup> |
|-------------|-----------------------------------------|-------------------|----------------------------------------|-----------------------------------------|----------------------------------------|
| 1 (10 runs) | 50                                      | 50                | 85–94                                  | N.D. <sup>b</sup>                       | 7–8                                    |
| 2           | 2.5                                     | 2.5               | 40                                     | 53                                      | 64                                     |
| 3           | 5                                       | 5                 | 55                                     | 36                                      | 44                                     |
| 4           | 10                                      | 10                | 72                                     | 16                                      | 29                                     |
| 5           | 20                                      | 20                | 87                                     | 2                                       | 17                                     |
| 6           | 25                                      | 25                | 93                                     | N.D.                                    | 15                                     |

<sup>a</sup> Determined by  $^1\text{H}$  NMR analysis using 1,1,2,2-tetrachloroethane as an internal standard. <sup>b</sup> Not Detected.

**Table S2.** Time course of the electrocatalytic reduction of **6a** using a PEM reactor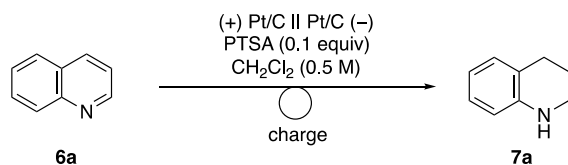

Experimental conditions: cell temperature, rt; current density, 25 mA/cm<sup>2</sup>; flow rate of solution, 0.75 mL/min; flow rate of hydrogen, 100 mL/min.

| charge (F/mol) | yield of <b>2a</b> (%) <sup>a</sup> | recov. of <b>1a</b> (%) <sup>a</sup> | current efficiency of <b>1a</b> (%) <sup>a</sup> |
|----------------|-------------------------------------|--------------------------------------|--------------------------------------------------|
| 5              | 55                                  | 42                                   | 44                                               |
| 10             | 82                                  | 14                                   | 33                                               |
| 15             | 87                                  | 6                                    | 23                                               |
| 20             | 91                                  | 2                                    | 18                                               |
| 25             | 93                                  | N.D. <sup>b</sup>                    | 15                                               |

<sup>a</sup> Determined by <sup>1</sup>H NMR analysis using 1,1,2,2-tetrachloroethane as an internal standard.

<sup>b</sup> Not Detected.

### General Procedure for hydrogenation of pyridines using a PEM reactor

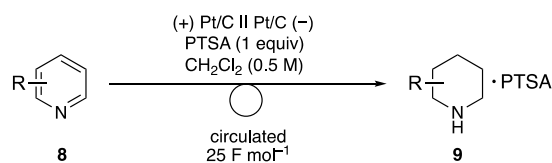

Experimental conditions: cell temperature, rt; current density, 25 mA/cm<sup>2</sup>; flow rate of solution, 0.75 mL/min; flow rate of hydrogen, 100 mL/min.

Electrocatalytic hydrogenations were carried out by using a PEM reactor (Figure S2). The MEA (3 cm × 10 cm, 1 cm × 4 cm: active area) was integrated into the PEM reactor. For the cathodic chamber, humidified nitrogen gas was supplied for 1 hour. After that, the solution of substrate **8** (1.5 mmol) and *p*-toluenesulfonic acid monohydrate (1.5 mmol, 1 equiv) in CH<sub>2</sub>Cl<sub>2</sub> (3 mL) was provided with 0.75 mL/min by a circular pump (YAMAZEN, MSP-001-0). For the anodic chamber, humidified hydrogen gas (flow rate: 100 mL/min) was supplied. A constant current (25 mA/cm<sup>2</sup>, 25 F/mol, 10 h) was supplied at room temperature. The yield of **9**·PTSA was determined by <sup>1</sup>H NMR analysis of the obtained cathodic reaction solution using 1,1,2,2-tetrachloroethane or ethylene carbonate as an internal standard. The spectra data were in good agreement with authentic samples.

### Procedure for Hydrogenation of Quinoline **6a** in a PEM Reactor Using H<sub>2</sub>O as a H<sup>+</sup> Source

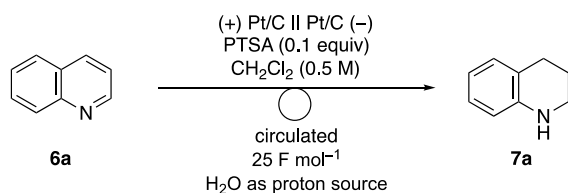

Experimental conditions: cell temperature, rt; current density, 25 mA/cm<sup>2</sup>; flow rate of solution, 0.75 mL/min; flow rate of H<sub>2</sub>O, 1.0 mL/min.

Electrocatalytic hydrogenations were carried out by using a PEM reactor (Figure S3). The MEA (3 cm × 10 cm, 1 cm × 4 cm: active area) including a DSE<sup>®</sup> electrode as an anolyte was integrated into the PEM reactor. For the

cathodic chamber, the solution of quinoline **6a** (193 mg, 1.5 mmol) and *p*-toluenesulfonic acid monohydrate (29 mg, 0.15 mmol) in CH<sub>2</sub>Cl<sub>2</sub> (3 mL) was provided with 0.75 mL/min by a circular pump (YAMAZEN, MSP-001-0). For the anodic chamber, H<sub>2</sub>O was provided with 1.0 mL/min by a circular pump. A constant current (25 mA/cm<sup>2</sup>, 25 F/mol, 10 h) was supplied at room temperature. To the obtained cathodic reaction solution was added NaOH aq (1.0 M, 5 mL), and the mixture was extracted with CH<sub>2</sub>Cl<sub>2</sub> (3 × 10 mL). The combined organic phase was washed with brine, dried over Na<sub>2</sub>SO<sub>4</sub>, filtered, and concentrated under reduced pressure. The residue was purified by column chromatography on silica gel eluting with hexane/EtOAc 2:1 to afford 1,2,3,4-tetrahydroquinoline (**7a**, 110 mg, 0.82 mmol, 55%).

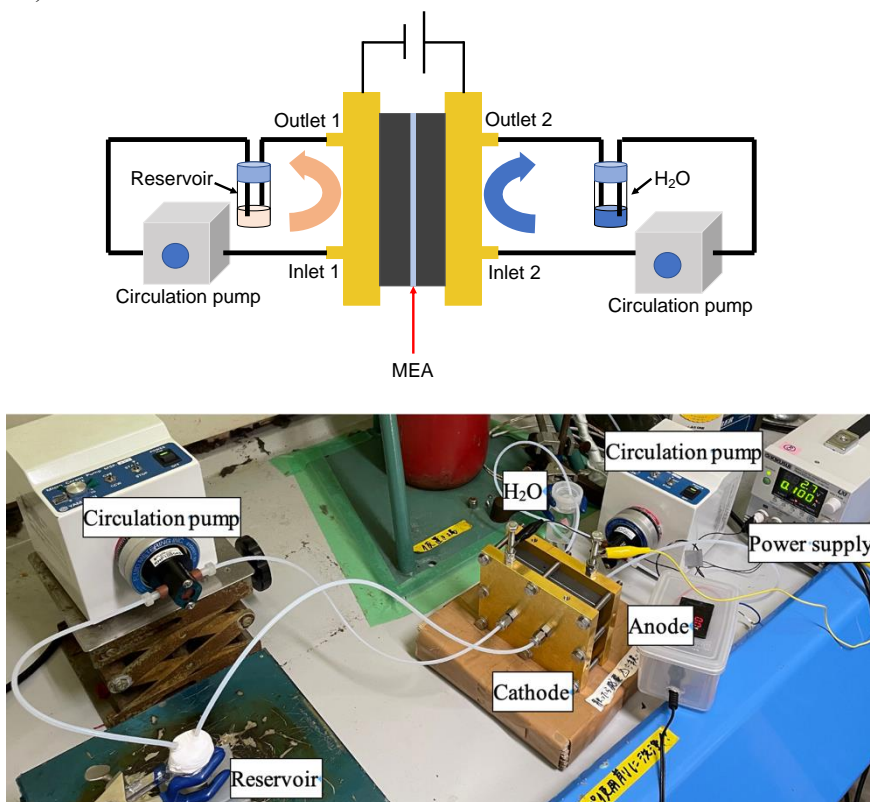

**Figure S3.** Hydrogenation system in a PEM reactor using H<sub>2</sub>O as a proton source.

### Procedure for hydrogenation of quinoline (**6a**) in a PEM reactor using 2 M H<sub>2</sub>SO<sub>4</sub> as a H<sup>+</sup> source

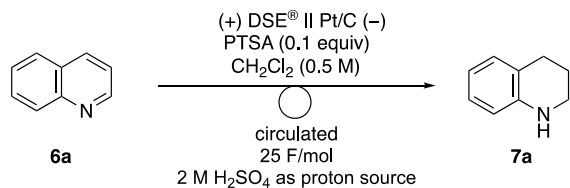

Experimental conditions: cell temperature, rt; current density, 25 mA/cm<sup>2</sup>; flow rate of solution, 0.75 mL/min; flow rate of 2 M H<sub>2</sub>SO<sub>4</sub> aq, 1.0 mL/min.

Electrocatalytic hydrogenations were carried out by using a PEM reactor. The MEA (3 cm × 10 cm, 1 cm × 4 cm: active area) including a DSE<sup>®</sup> electrode as an anolyte was integrated into the PEM reactor. For the cathodic chamber, the solution of quinoline **6a** (193 mg, 1.5 mmol) and *p*-toluenesulfonic acid monohydrate (29 mg, 0.15 mmol) in CH<sub>2</sub>Cl<sub>2</sub> (3 mL) was provided with 0.75 mL/min by a circular pump (YAMAZEN, MSP-001-0). For the anodic chamber, 2 M H<sub>2</sub>SO<sub>4</sub> was provided with 1.0 mL/min by a circular pump. A constant current (25 mA/cm<sup>2</sup>, 25 F/mol, 10 h) was supplied at room temperature. To the obtained cathodic reaction solution was added NaOH aq (1.0 M, 5 mL), and the mixture was extracted with CH<sub>2</sub>Cl<sub>2</sub> (3 × 10 mL). The combined organic phase was washed with brine, dried over Na<sub>2</sub>SO<sub>4</sub>, filtered, and concentrated under reduced pressure. The residue was purified by column chromatography on silica gel eluting with hexane/EtOAc 2:1 to afford 1,2,3,4-tetrahydroquinoline (**7a**, 156 mg, 1.2 mmol, 80%).

### Procedure for the hydrogenation of pyridine (**8a**) in a PEM reactor using 2 M H<sub>2</sub>SO<sub>4</sub> as a proton source.

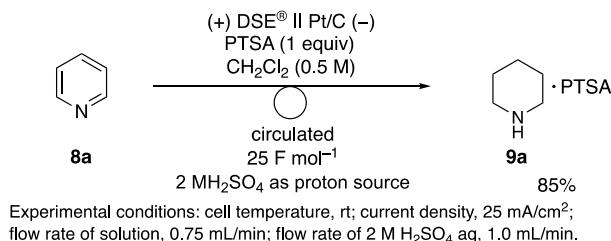

Experimental conditions: cell temperature, rt; current density, 25 mA/cm<sup>2</sup>; flow rate of solution, 0.75 mL/min; flow rate of 2 M H<sub>2</sub>SO<sub>4</sub> aq, 1.0 mL/min.

Electrocatalytic hydrogenations were carried out by using a PEM reactor. The MEA (3 cm × 10 cm, 1 cm × 4 cm: active area) including a DSE<sup>®</sup> electrode as an anolyte was integrated into the PEM reactor. For the cathodic chamber, the solution of pyridine **8a** (119 mg, 1.5 mmol) and *p*-toluenesulfonic acid monohydrate (286 mg, 1.5 mmol) in CH<sub>2</sub>Cl<sub>2</sub> (3 mL) was provided with 0.75 mL/min by a circular pump (YAMAZEN, MSP-001-0). For the anodic chamber, 2 M H<sub>2</sub>SO<sub>4</sub> aq was provided with 1.0 mL/min by a circular pump. A constant current (25 mA/cm<sup>2</sup>, 25 F/mol, 10 h) was supplied at room temperature. The yield of **9a**·PTSA was determined by the <sup>1</sup>H NMR analysis of the obtained cathodic reaction solution using 1,1,2,2-tetrachloroethane as an internal standard (85% yield).

## References

- (1) Anand, N.; Koley, S.; Ramulu, J.; Singh, M. S. *Org. Biomol. Chem.* **2015**, *13*, 9570–9574.
- (2) Ma, W.; Zhang, J.; Xu, C.; Chen, F.; He, Y.-M.; Fan, Q.-H. *Angew. Chem., Int. Ed.* **2016**, *55*, 12891–12894.
- (3) Duan, Y.-N.; Du, Xi.; Cui, Z.; Zeng, Y.; Liu, Y.; Yang, T.; Wen, J.; Zhang, X. *J. Am. Chem. Soc.* **2019**, *141*, 20424–20433.
- (4) Yang, C.-H.; Chen, X.; Li, H.; Wei, W.; Yang, Z.; Chang, J. *Chem. Commun.* **2018**, *54*, 8622–8625.
- (5) Wu, J.; Wang, C.; Tang, W.; Pettman, A.; Xiao, J. *Chem. Eur. J.* **2012**, *18*, 9525–9529.
- (6) Sorribes, I.; Liu, L.; Doménech-Carbó, A.; Corma, A. *ACS Catal.* **2018**, *8*, 4545–4557.
- (7) Compain, G.; Bonneau, C.; Martin-Mingot, A.; Thibaudeau, S. *J. Org. Chem.* **2013**, *78*, 4463–4472.
- (8) Kuwano, R.; Ikeda, R.; Hirasada, K. *Chem. Commun.* **2015**, *51*, 7558–7561.
- (9) Yadav, S.; Chaudhary, D.; Maurya, N. K.; Kumar, D.; Ishu, K.; Kuram, M. R. *Chem. Commun.* **2022**, *58*, 4255–4258.

**1,2,3,4-Tetrahydroquinoline (7a)  $^1\text{H}$  NMR (600 MHz,  $\text{CDCl}_3$ )**

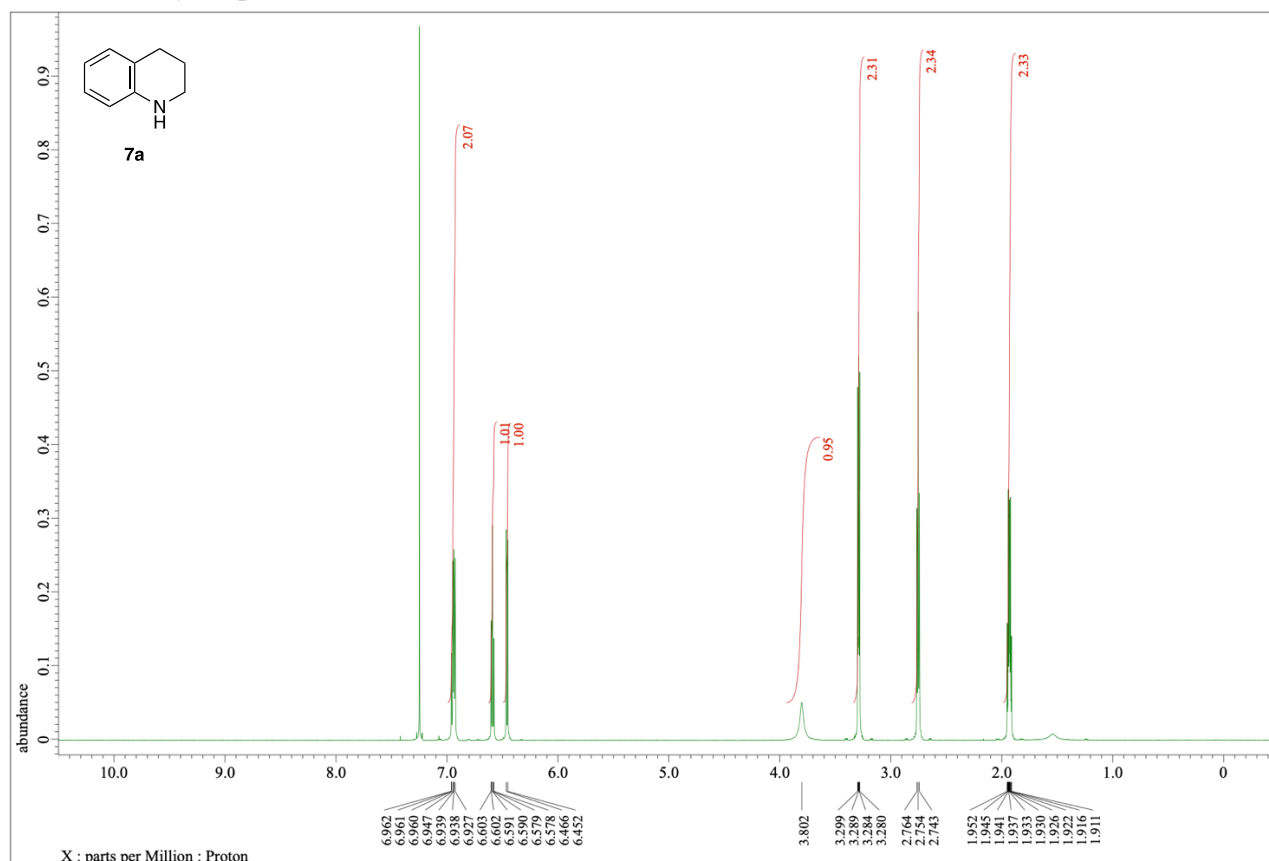

**1,2,3,4-Tetrahydroquinoline (7a)  $^{13}\text{C}\{^1\text{H}\}$  NMR (150 MHz,  $\text{CDCl}_3$ )**

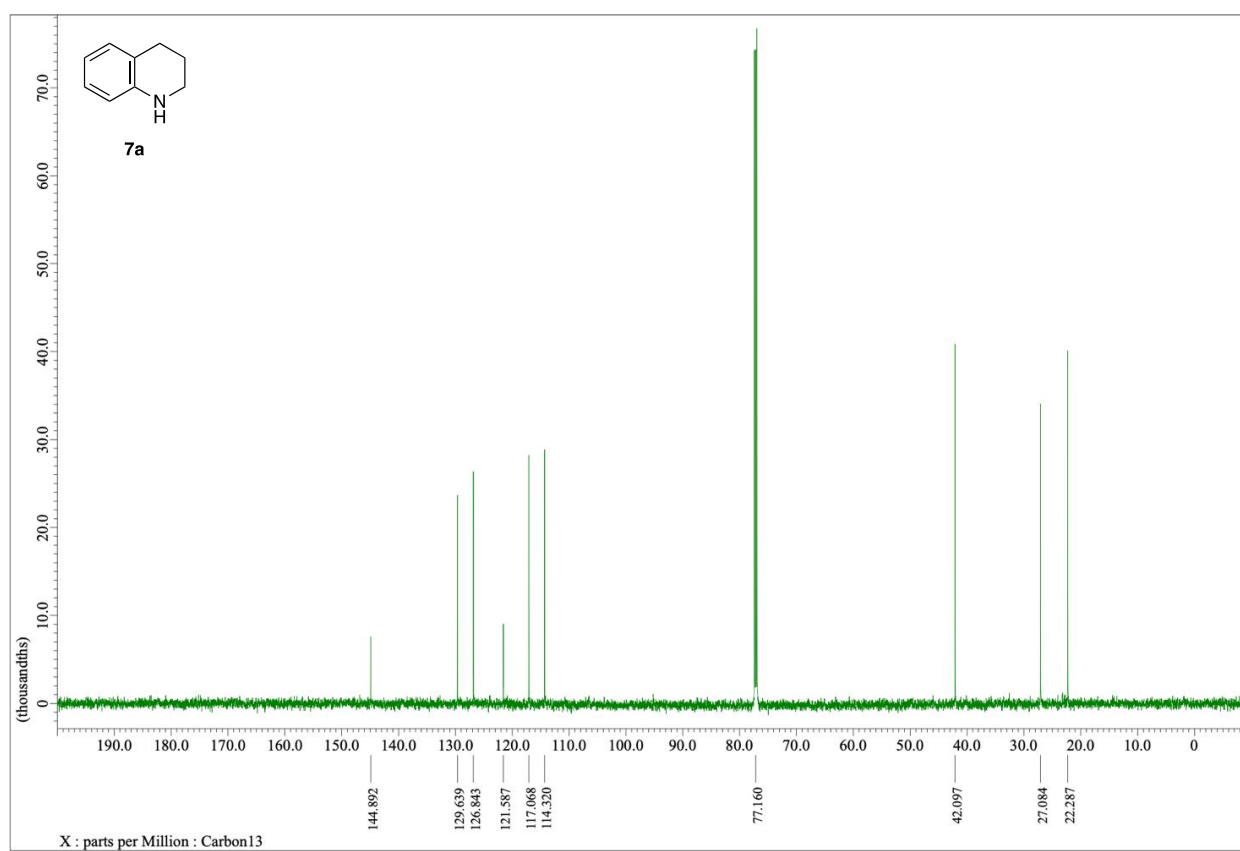

**8-Methyl-1,2,3,4-tetrahydroquinoline (7b)  $^1\text{H}$  NMR (600 MHz,  $\text{CDCl}_3$ )**

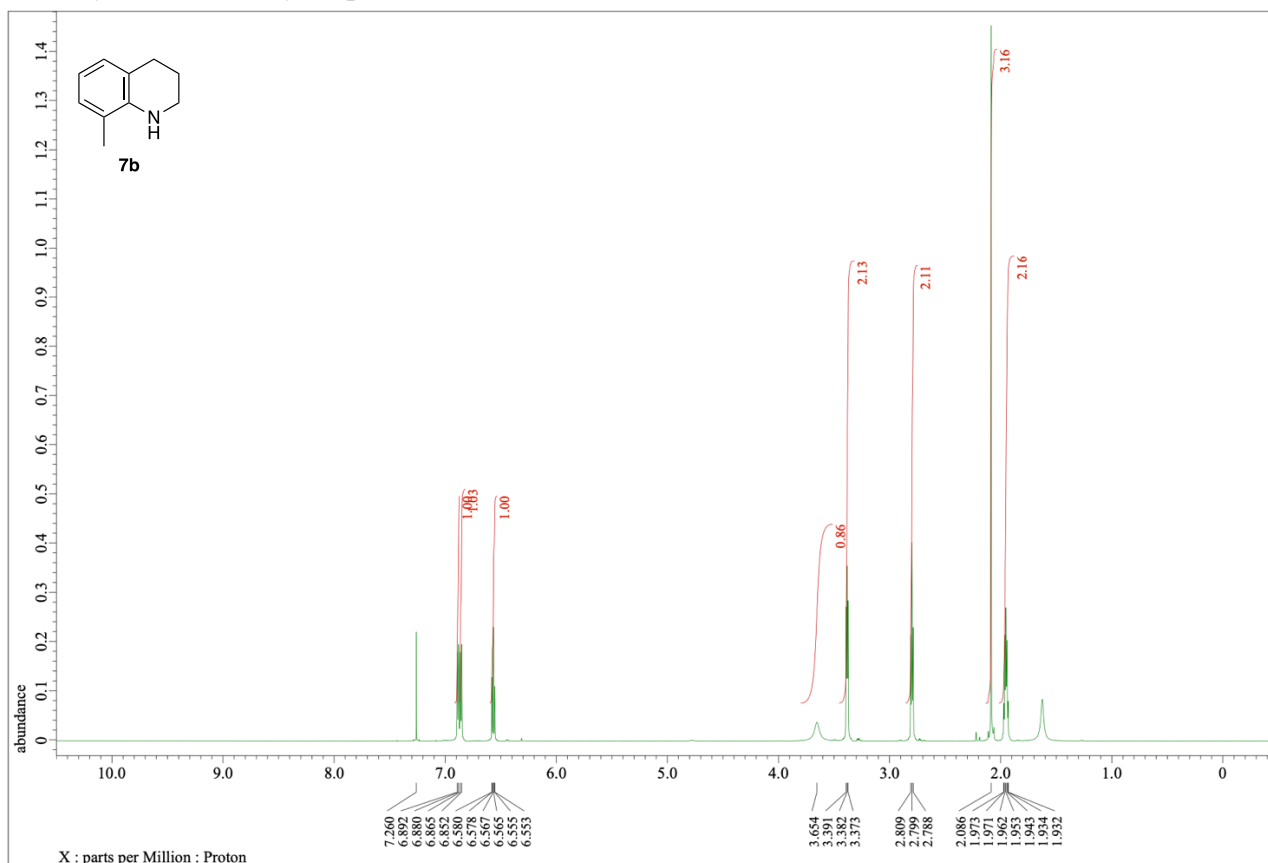

**8-Methyl-1,2,3,4-tetrahydroquinoline (7b)  $^{13}\text{C}\{^1\text{H}\}$  NMR (150 MHz,  $\text{CDCl}_3$ )**

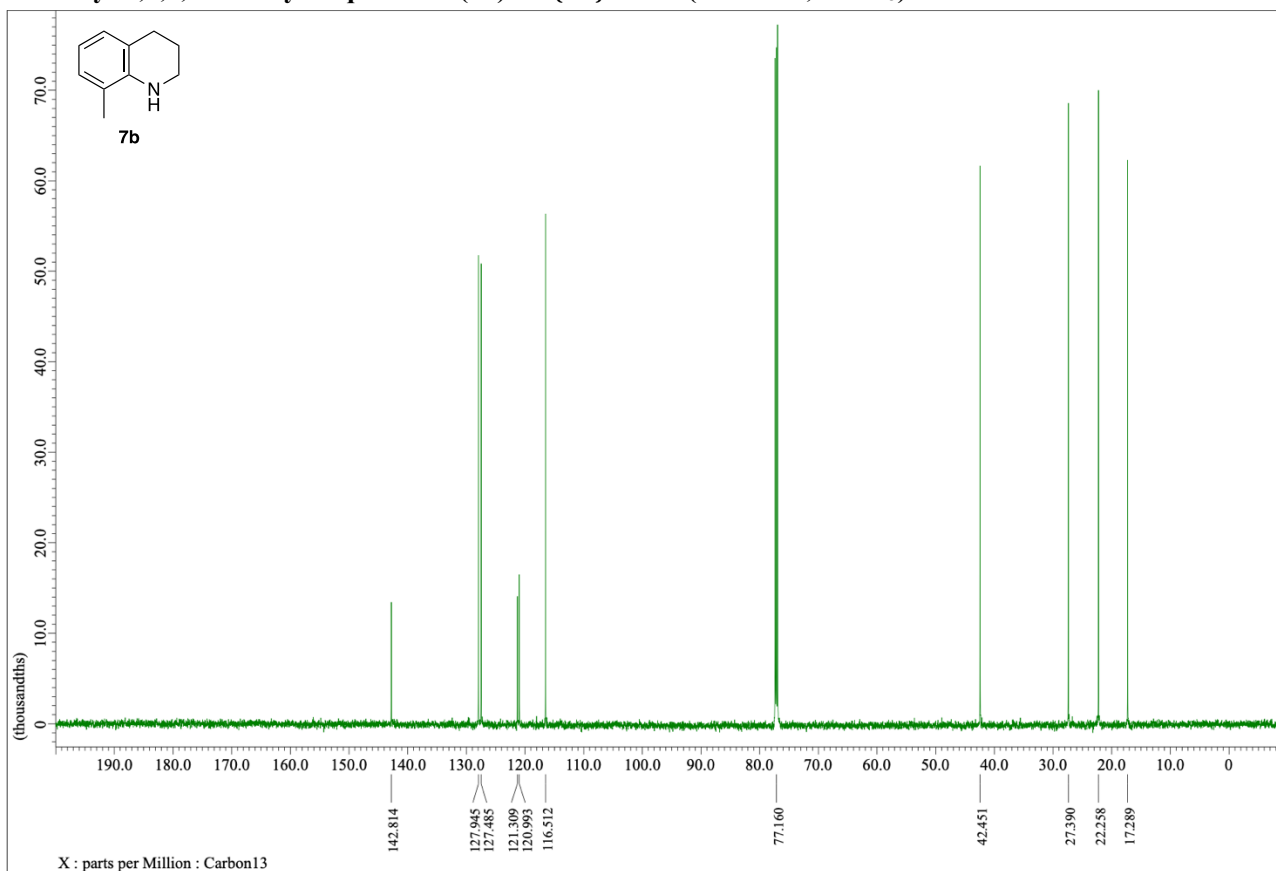

**7-Methyl-1,2,3,4-tetrahydroquinoline (7c)  $^1\text{H}$  NMR (600 MHz,  $\text{CDCl}_3$ )**

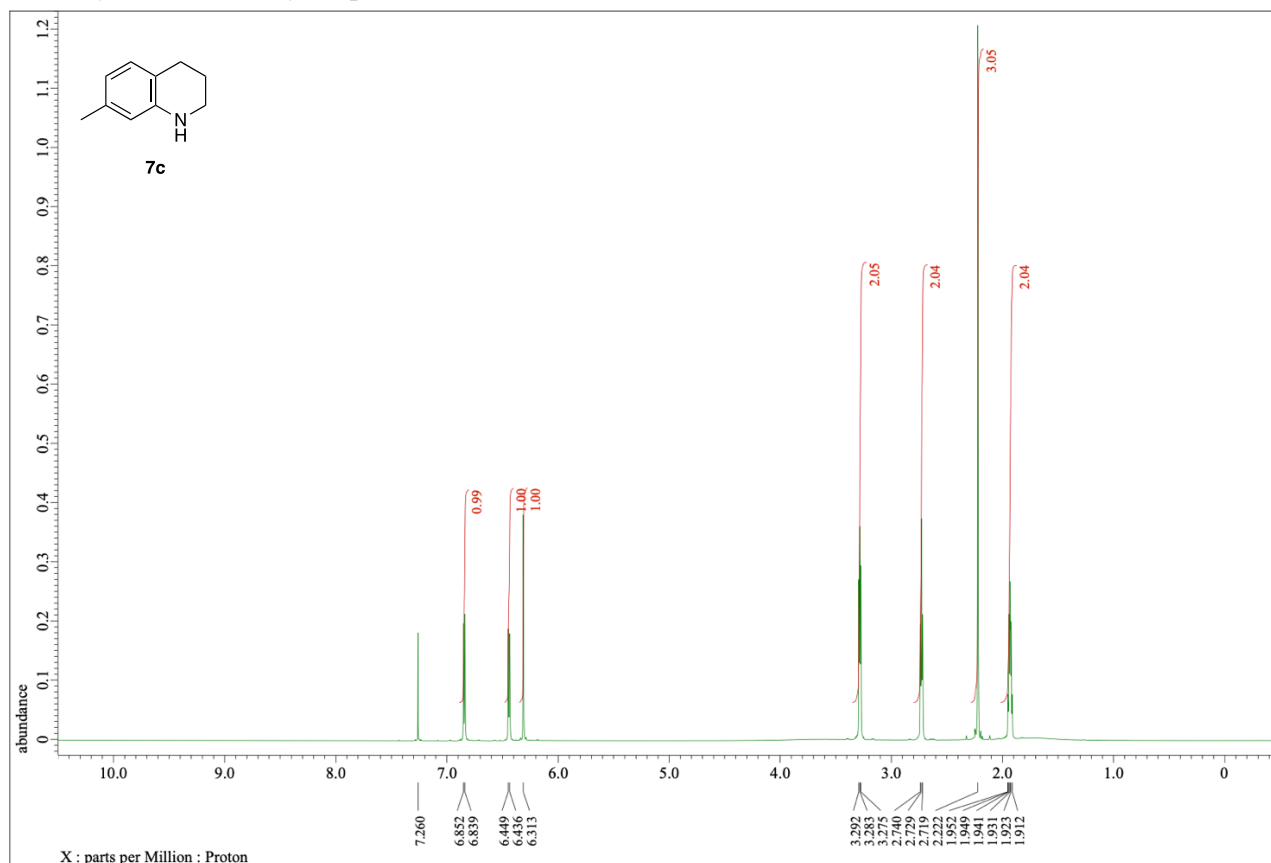

**7-Methyl-1,2,3,4-tetrahydroquinoline (7c)  $^{13}\text{C}\{^1\text{H}\}$  NMR (150 MHz,  $\text{CDCl}_3$ )**

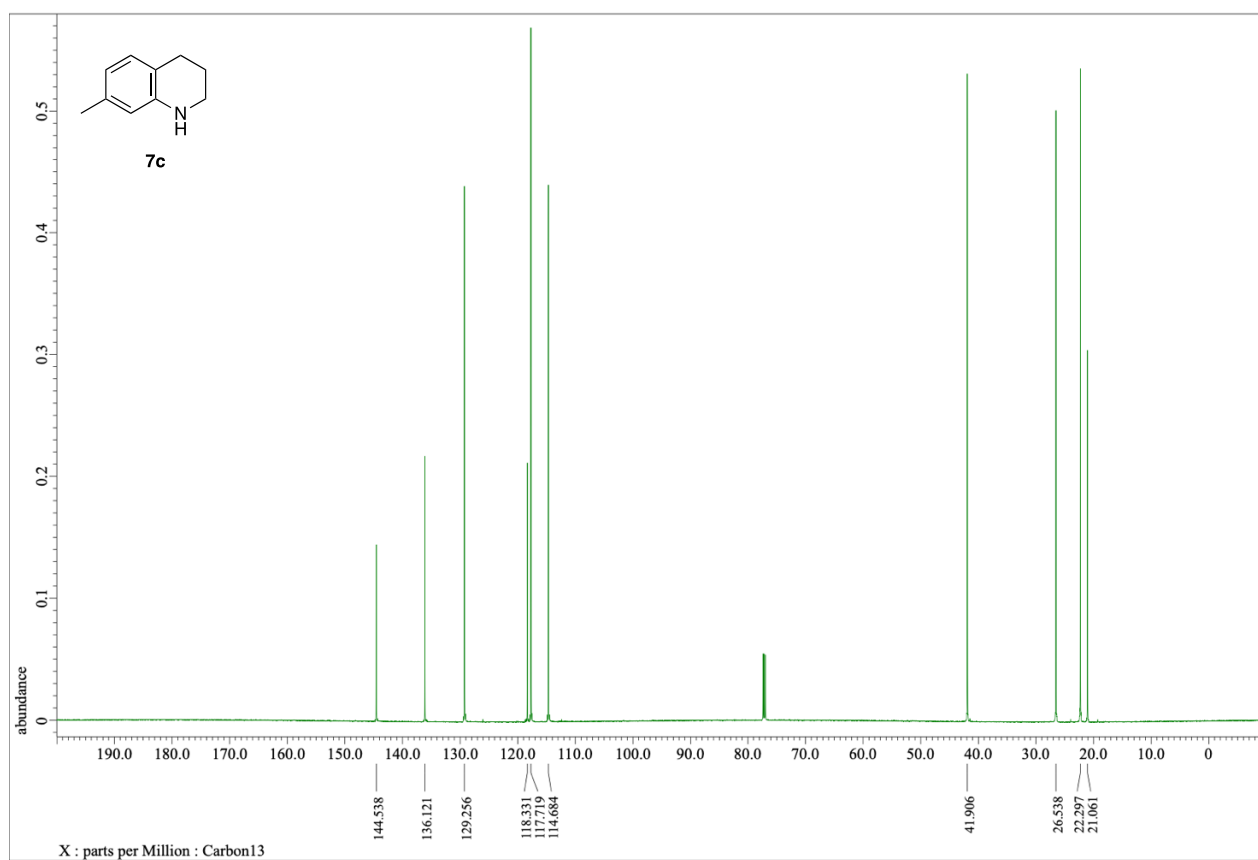

**6-Methyl-1,2,3,4-tetrahydroquinoline (7d)  $^1\text{H}$  NMR (600 MHz,  $\text{CDCl}_3$ )**

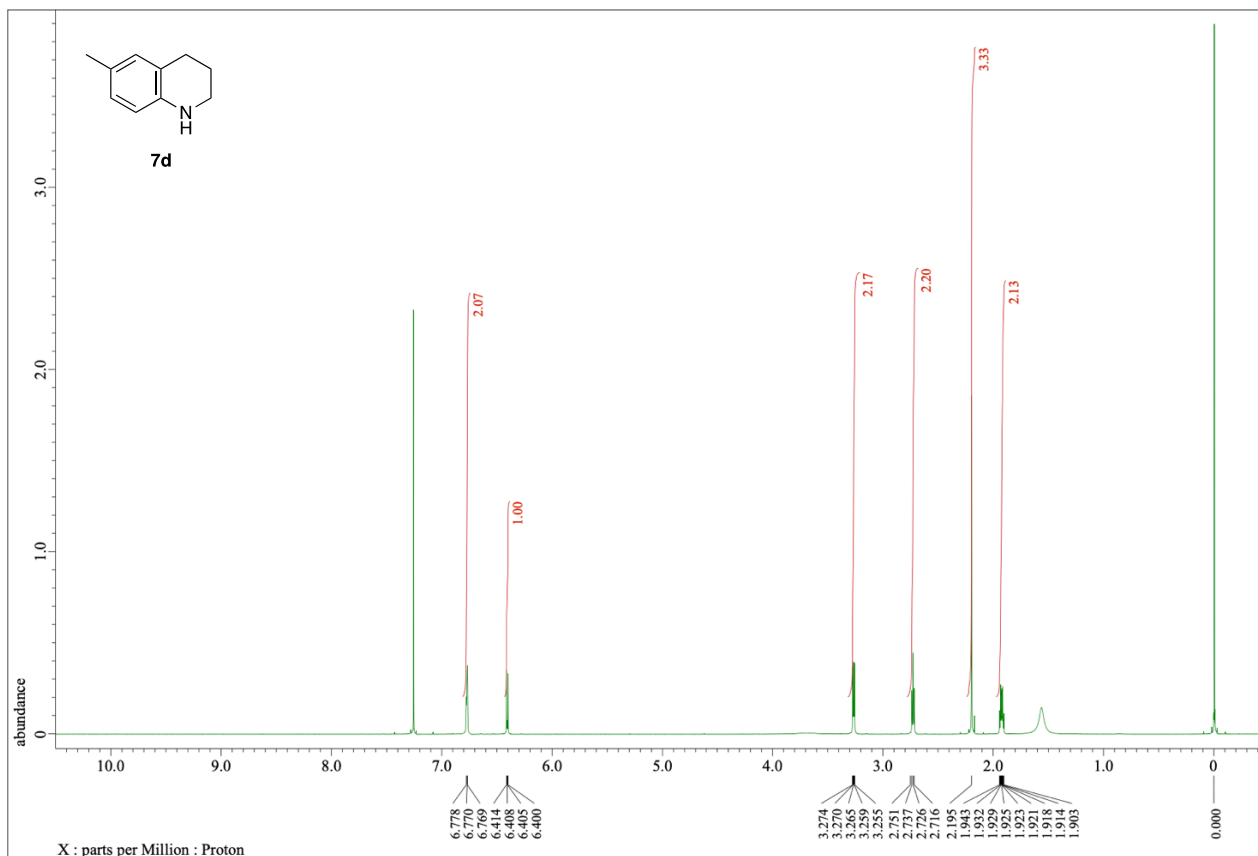

**6-Methyl-1,2,3,4-tetrahydroquinoline (7d)  $^{13}\text{C}\{^1\text{H}\}$  NMR (150 MHz,  $\text{CDCl}_3$ )**

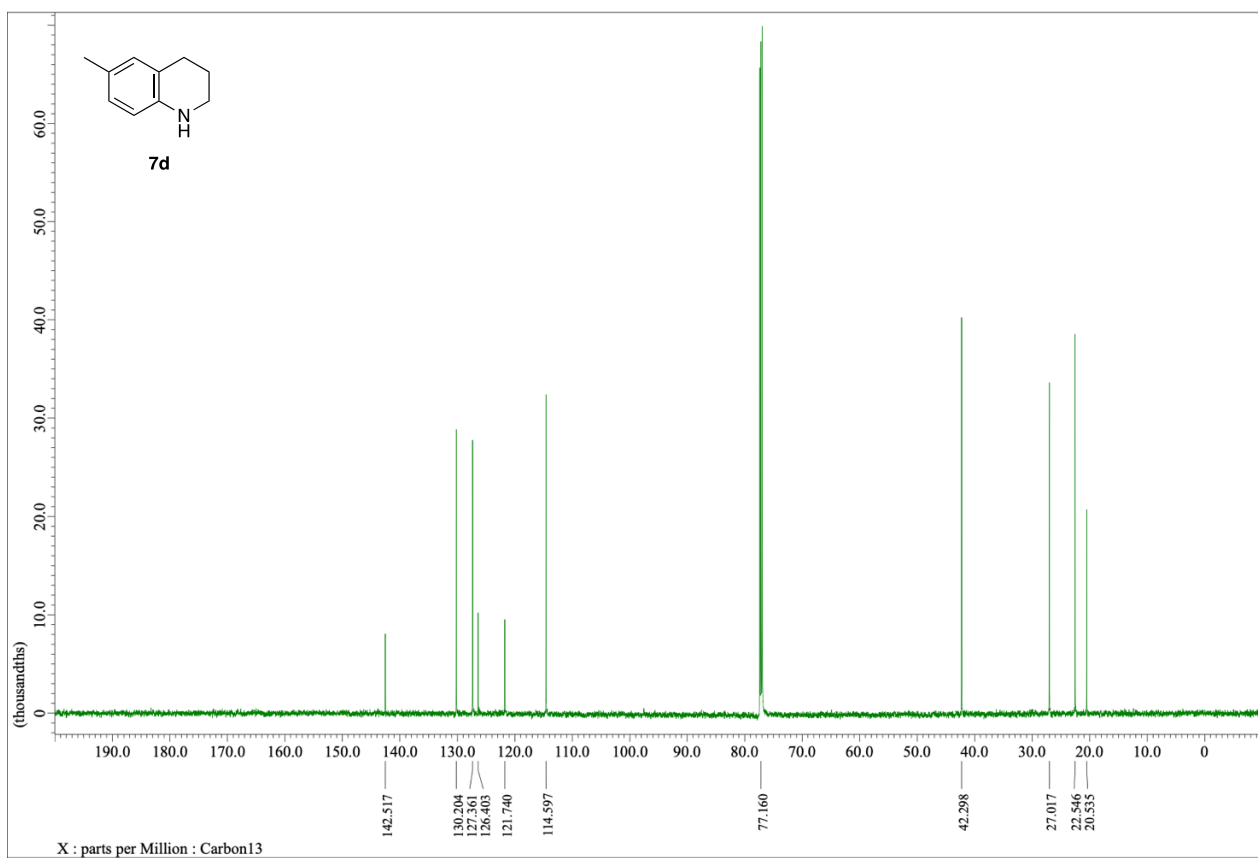

**5-Methyl-1,2,3,4-tetrahydroquinoline (7e)  $^1\text{H}$  NMR (600 MHz,  $\text{CDCl}_3$ )**

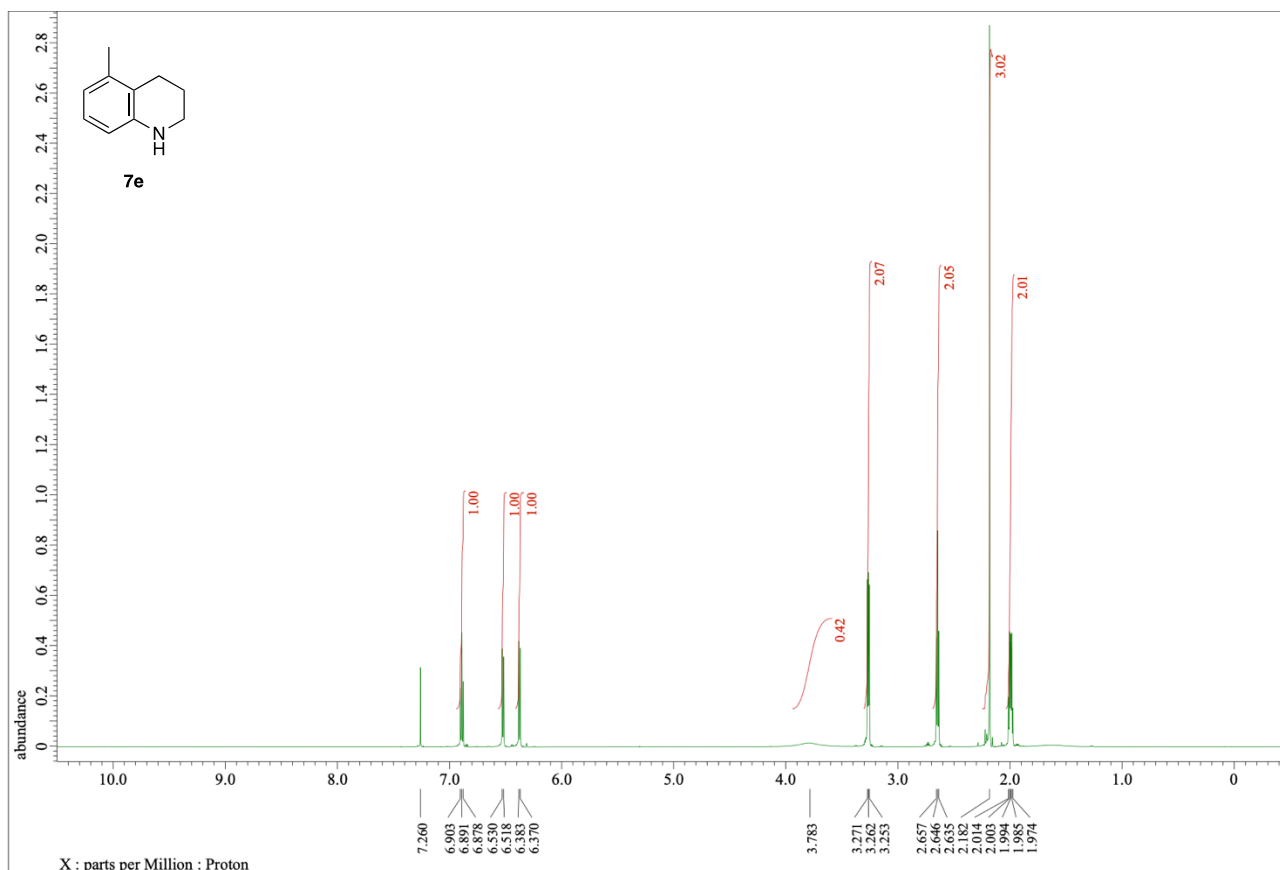

**5-Methyl-1,2,3,4-tetrahydroquinoline (7e)  $^{13}\text{C}\{^1\text{H}\}$  NMR (150 MHz,  $\text{CDCl}_3$ )**

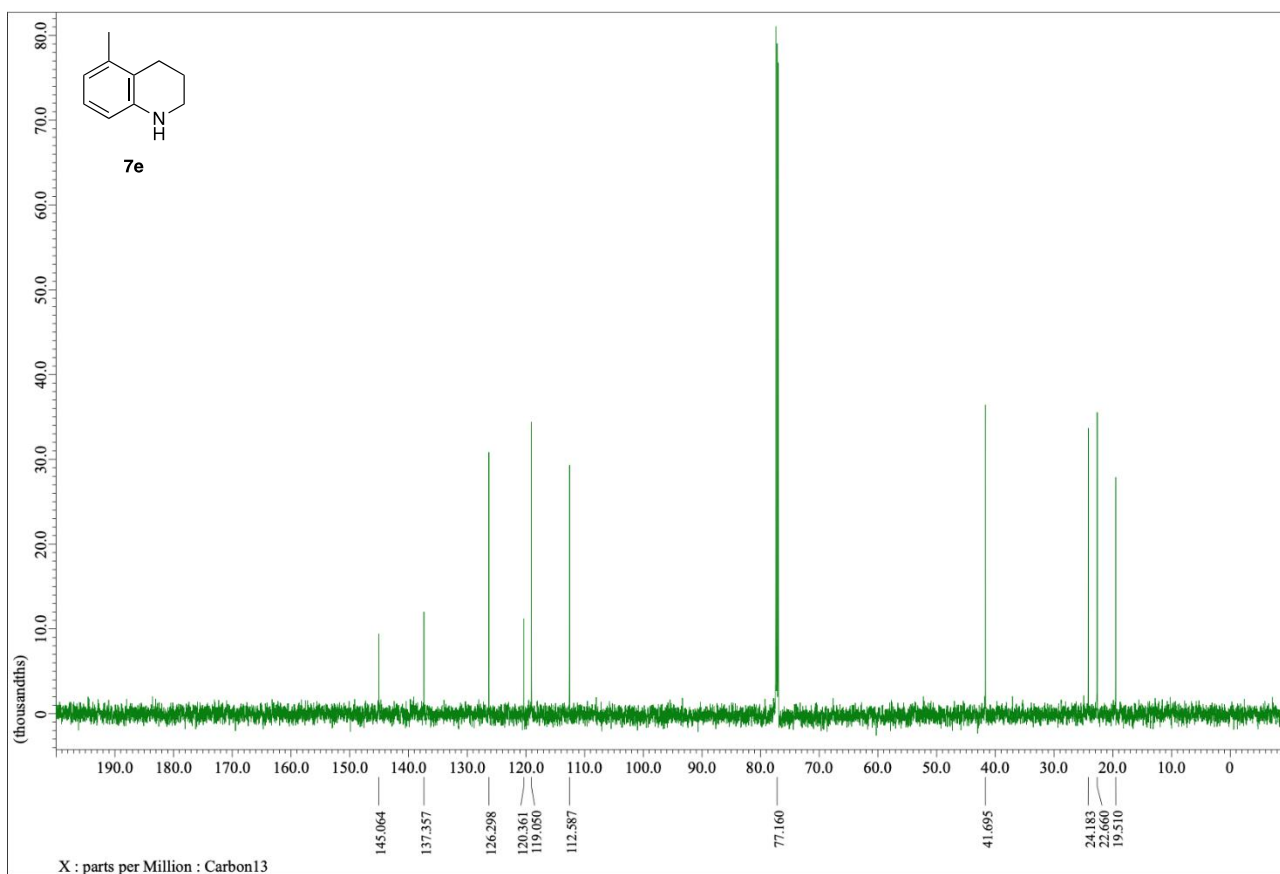

**3-Methyl-1,2,3,4-tetrahydroquinoline (7g)  $^1\text{H}$  NMR (600 MHz,  $\text{CDCl}_3$ )**

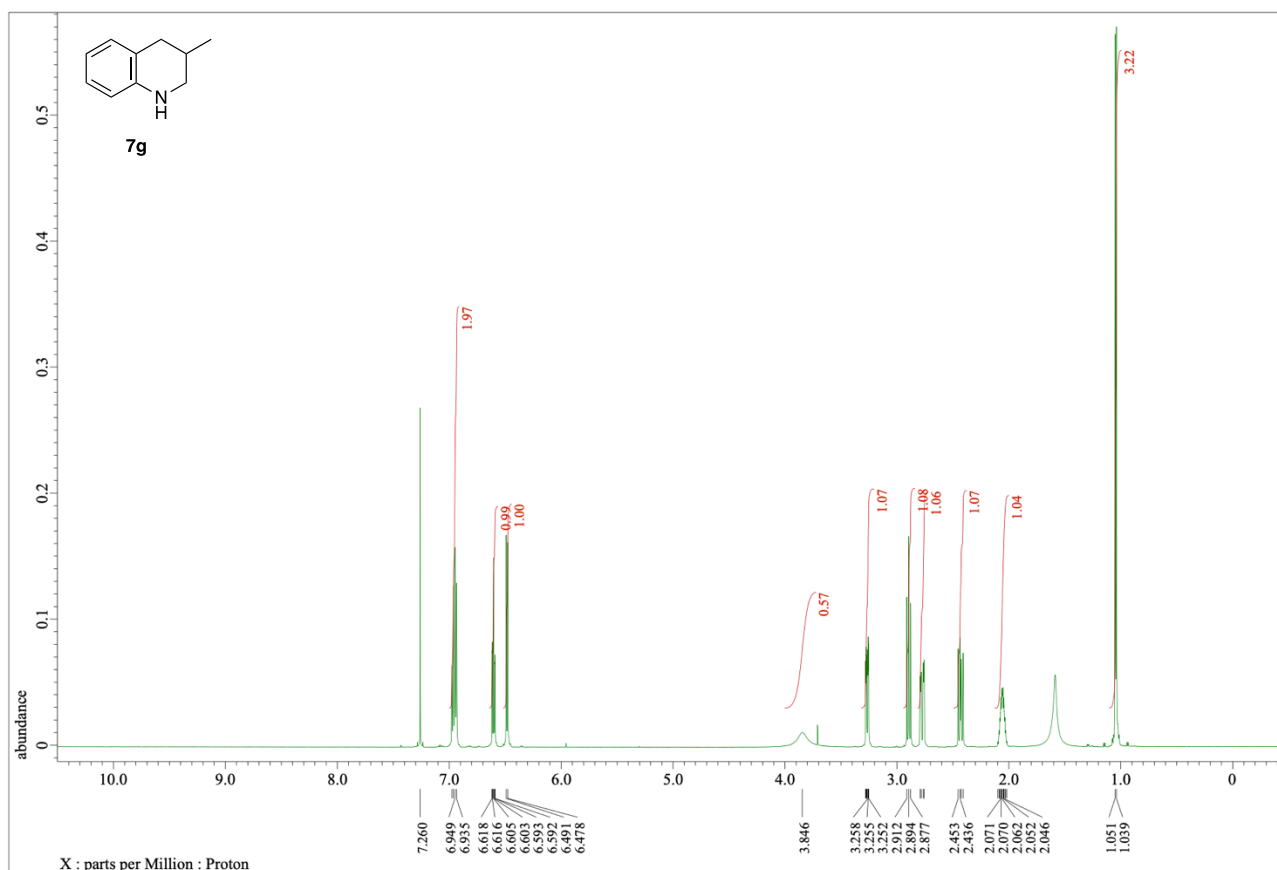

**3-Methyl-1,2,3,4-tetrahydroquinoline (7g)  $^{13}\text{C}\{^1\text{H}\}$  NMR (150 MHz,  $\text{CDCl}_3$ )**

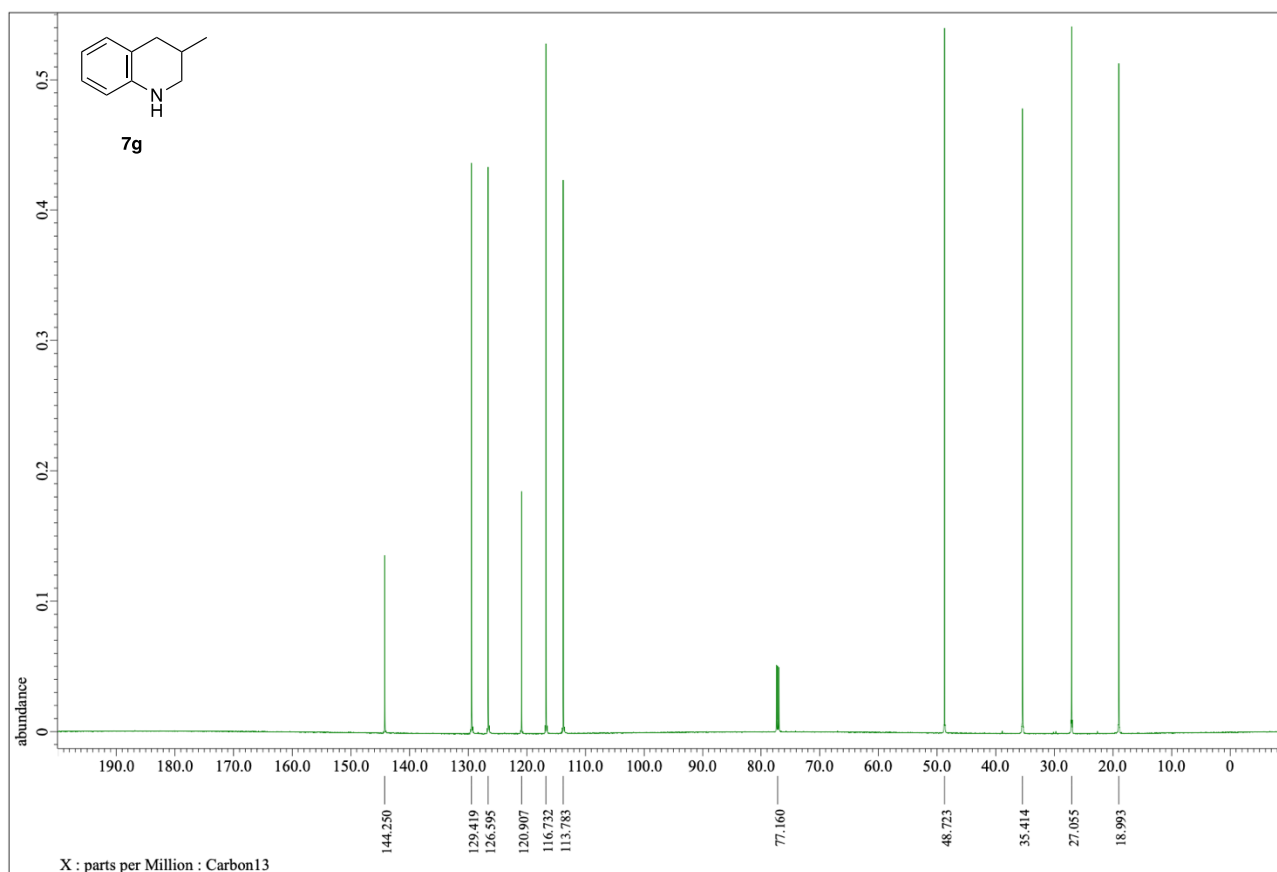

**2-Methyl-1,2,3,4-tetrahydroquinoline (7h)  $^1\text{H}$  NMR (600 MHz,  $\text{CDCl}_3$ )**

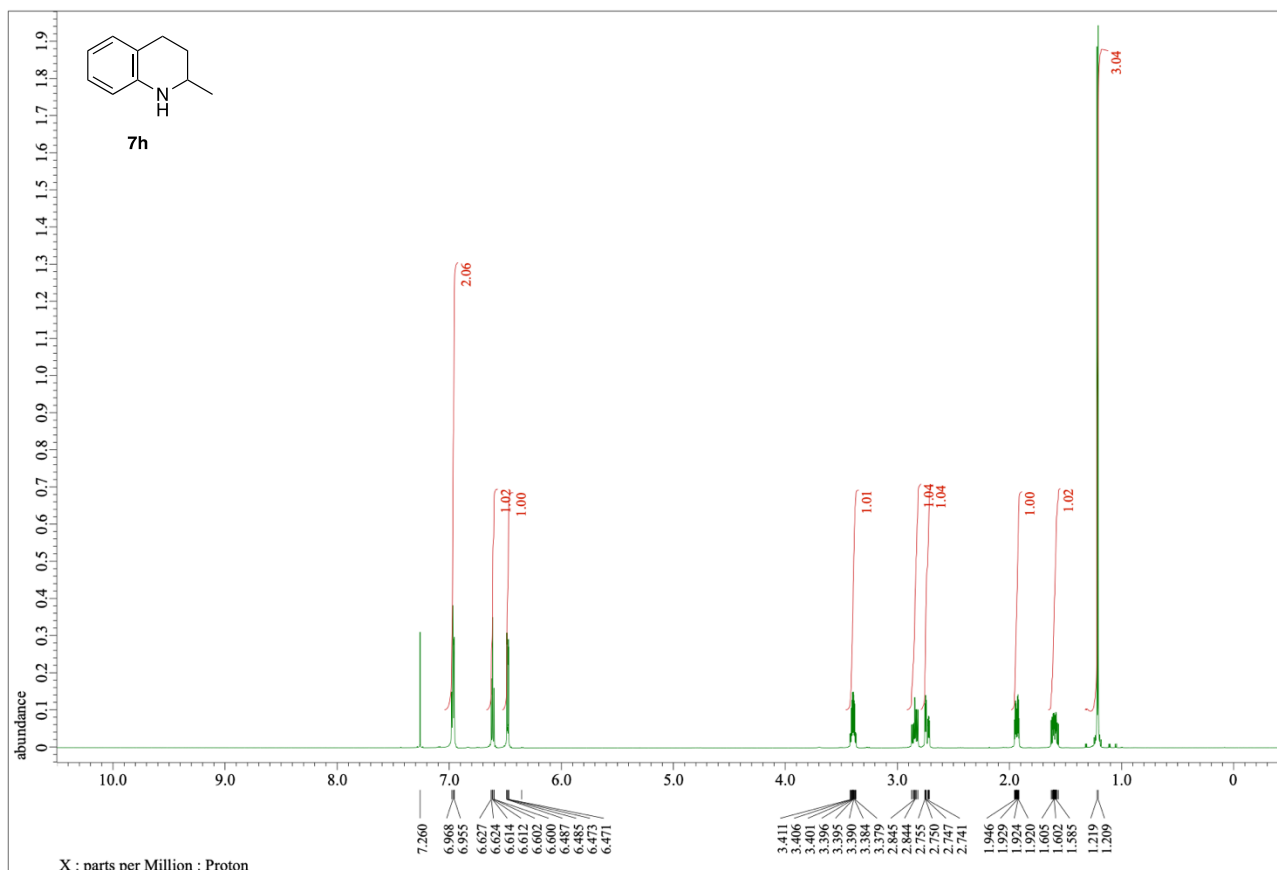

**2-Methyl-1,2,3,4-tetrahydroquinoline (7h)  $^{13}\text{C}\{^1\text{H}\}$  NMR (150 MHz,  $\text{CDCl}_3$ )**

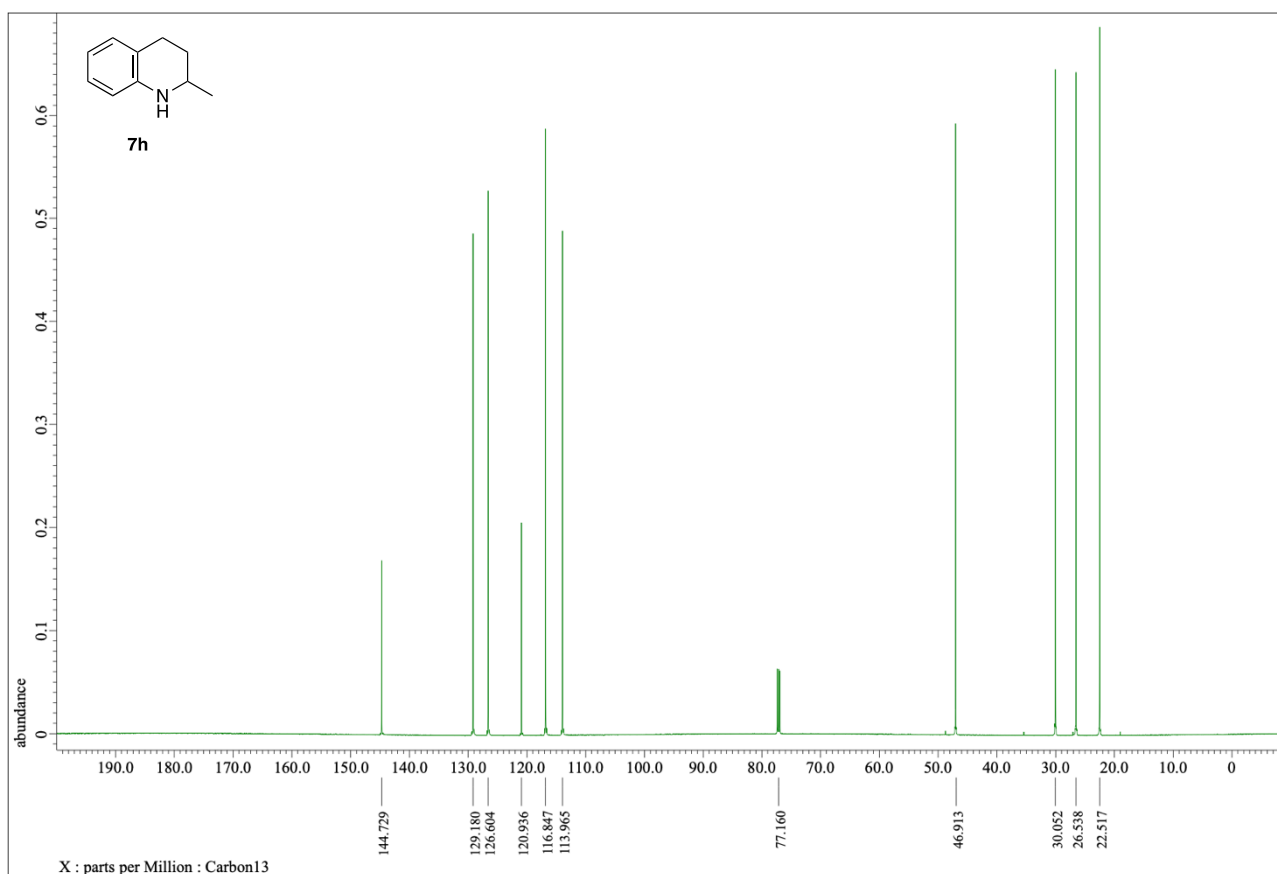

**2,3-Dimethyl-1,2,3,4-tetrahydroquinoline (7i)  $^1\text{H}$  NMR (600 MHz,  $\text{CDCl}_3$ )**

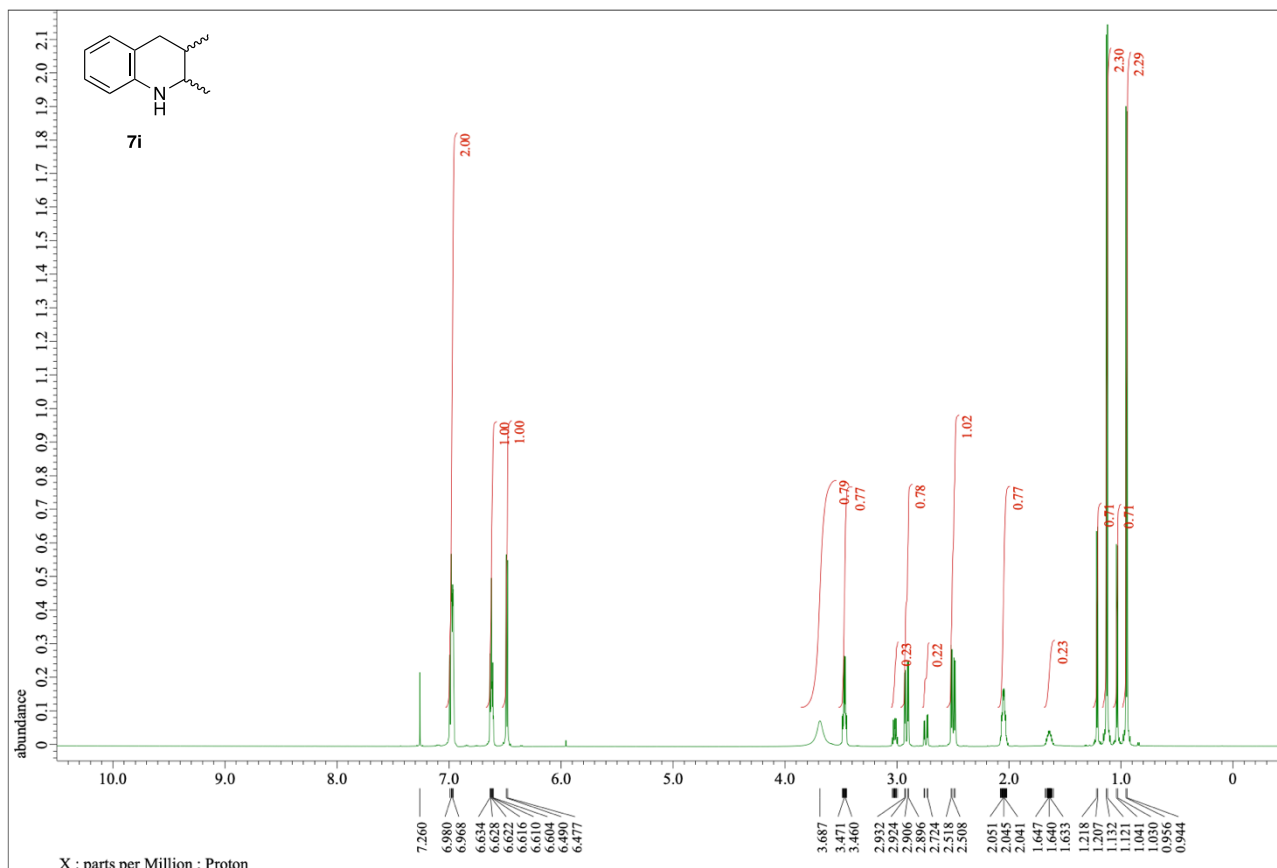

**2,3-Dimethyl-1,2,3,4-tetrahydroquinoline (7i)  $^{13}\text{C}$   $\{^1\text{H}\}$  NMR (150 MHz,  $\text{CDCl}_3$ )**

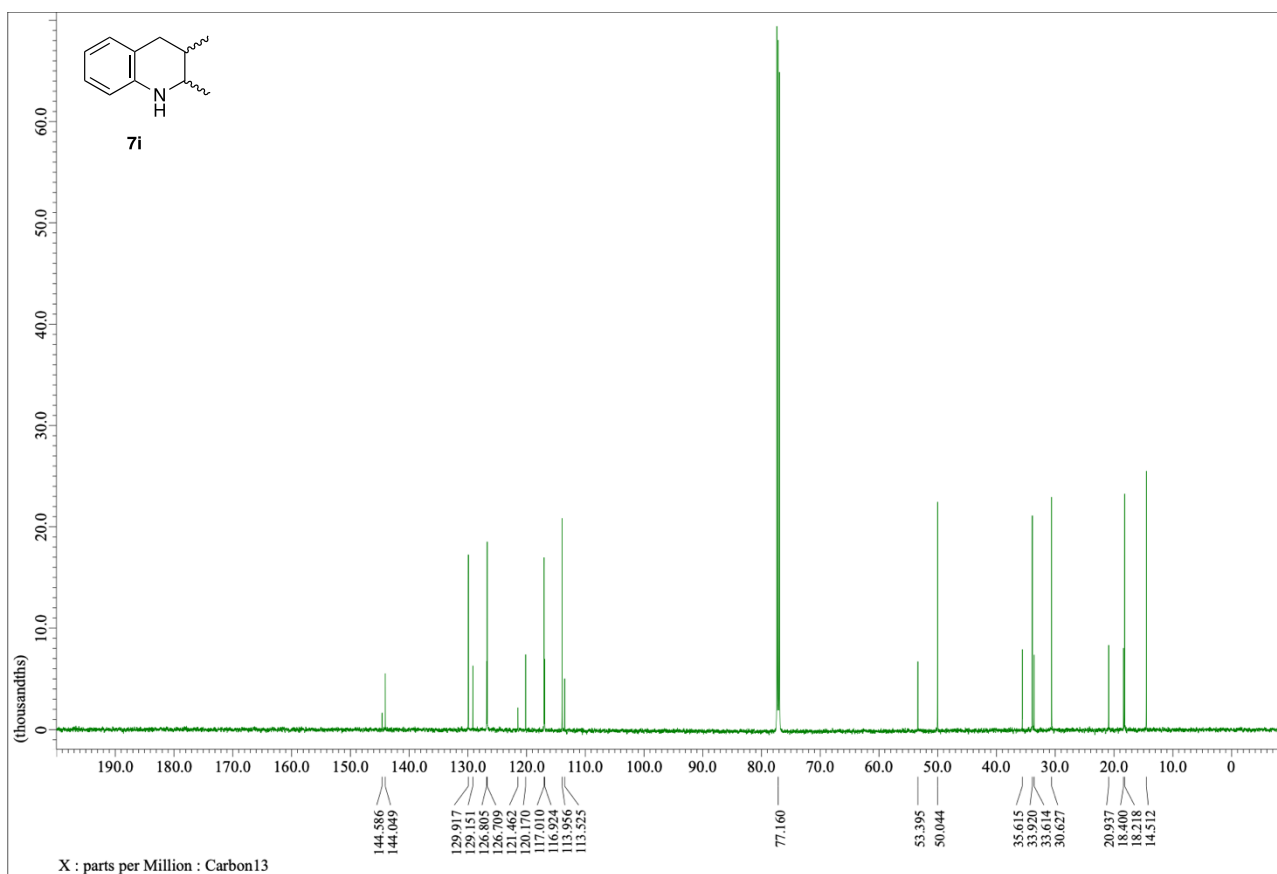

**2-Phenyl-1,2,3,4-tetrahydroquinoline (7j)  $^1\text{H}$  NMR (600 MHz,  $\text{CDCl}_3$ )**

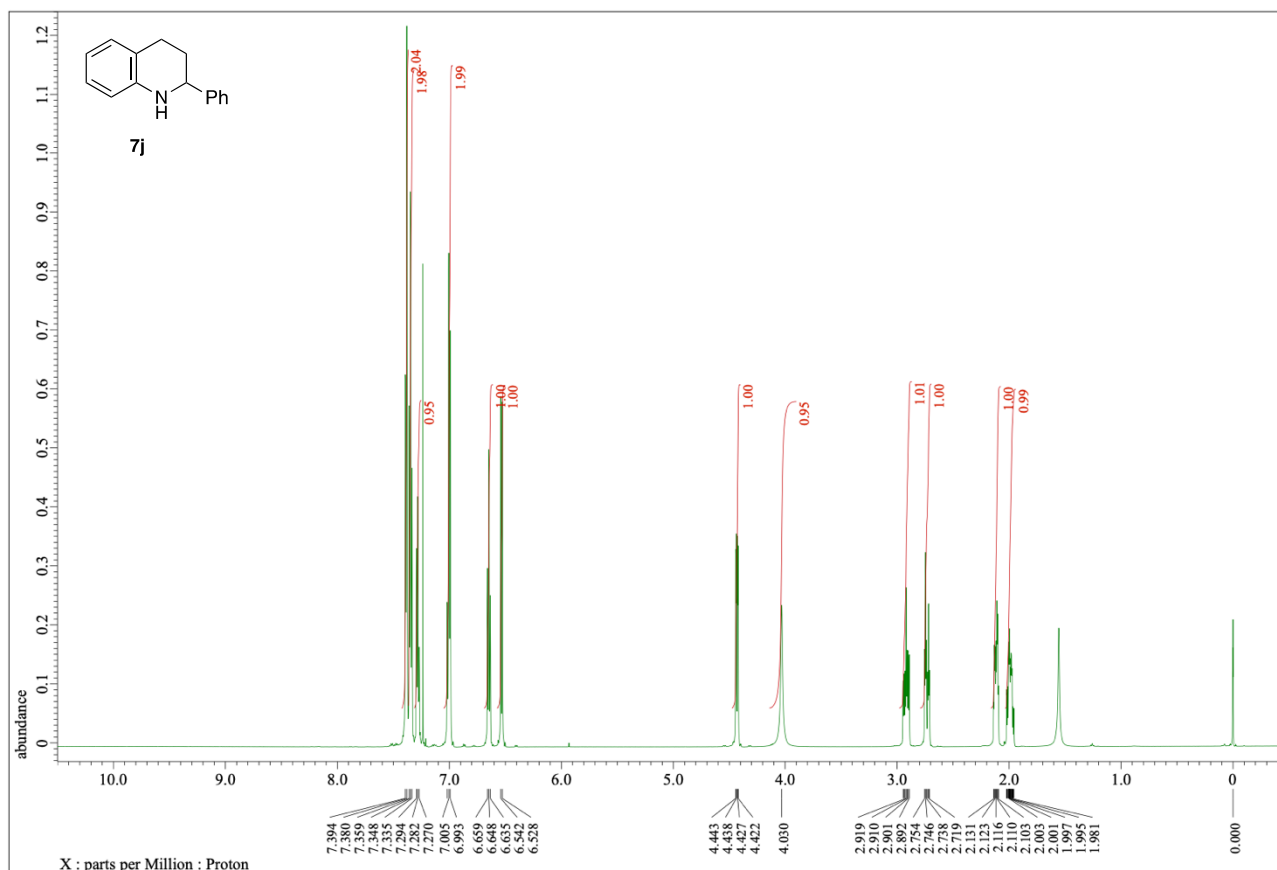

**2-Phenyl-1,2,3,4-tetrahydroquinoline (7j)  $^{13}\text{C}\{^1\text{H}\}$  NMR (150 MHz,  $\text{CDCl}_3$ )**

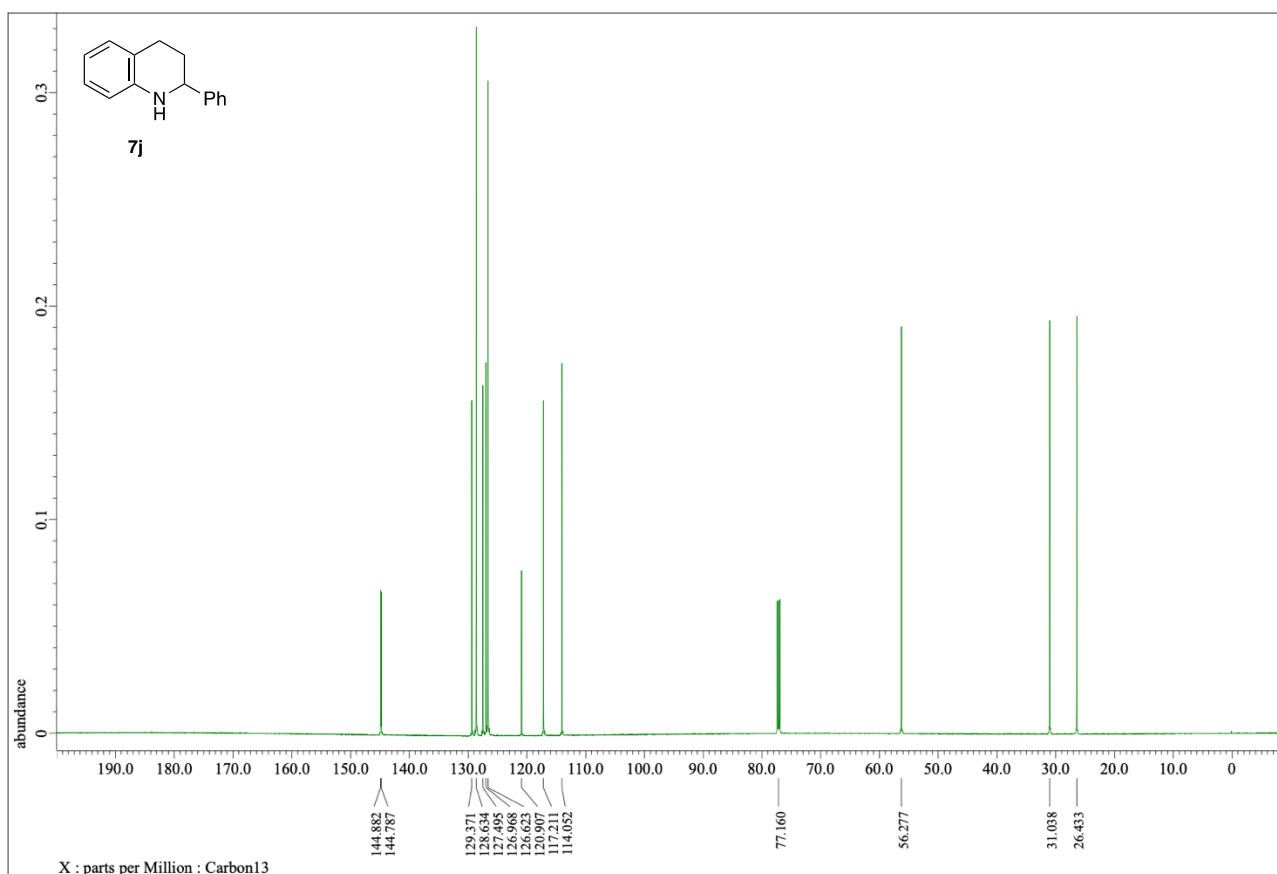

**6-Acetyl-1,2,3,4-tetrahydroquinoline (7k)  $^1\text{H}$  NMR (600 MHz,  $\text{CDCl}_3$ )**

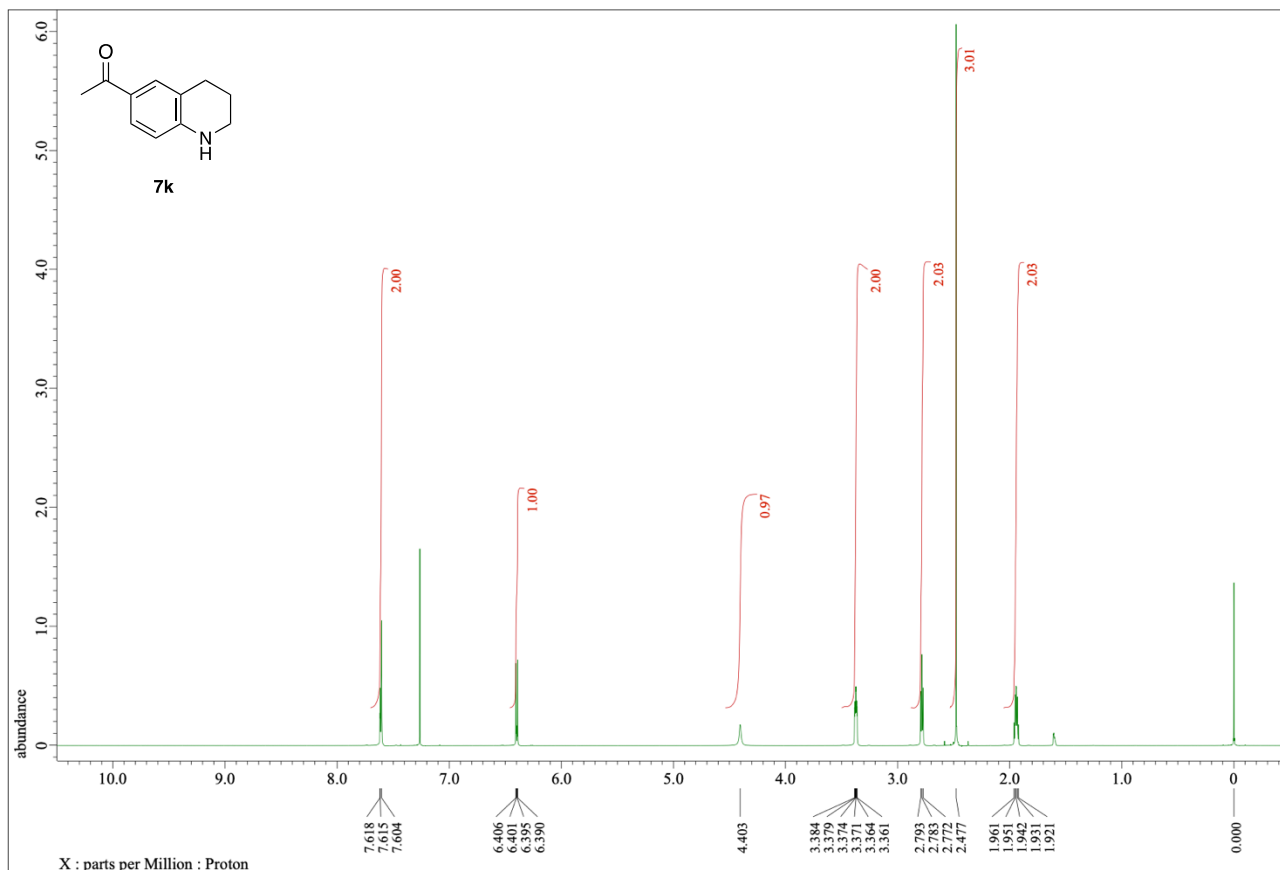

**6-Acetyl-1,2,3,4-tetrahydroquinoline (7k)  $^{13}\text{C}$   $\{^1\text{H}\}$  NMR (150 MHz,  $\text{CDCl}_3$ )**

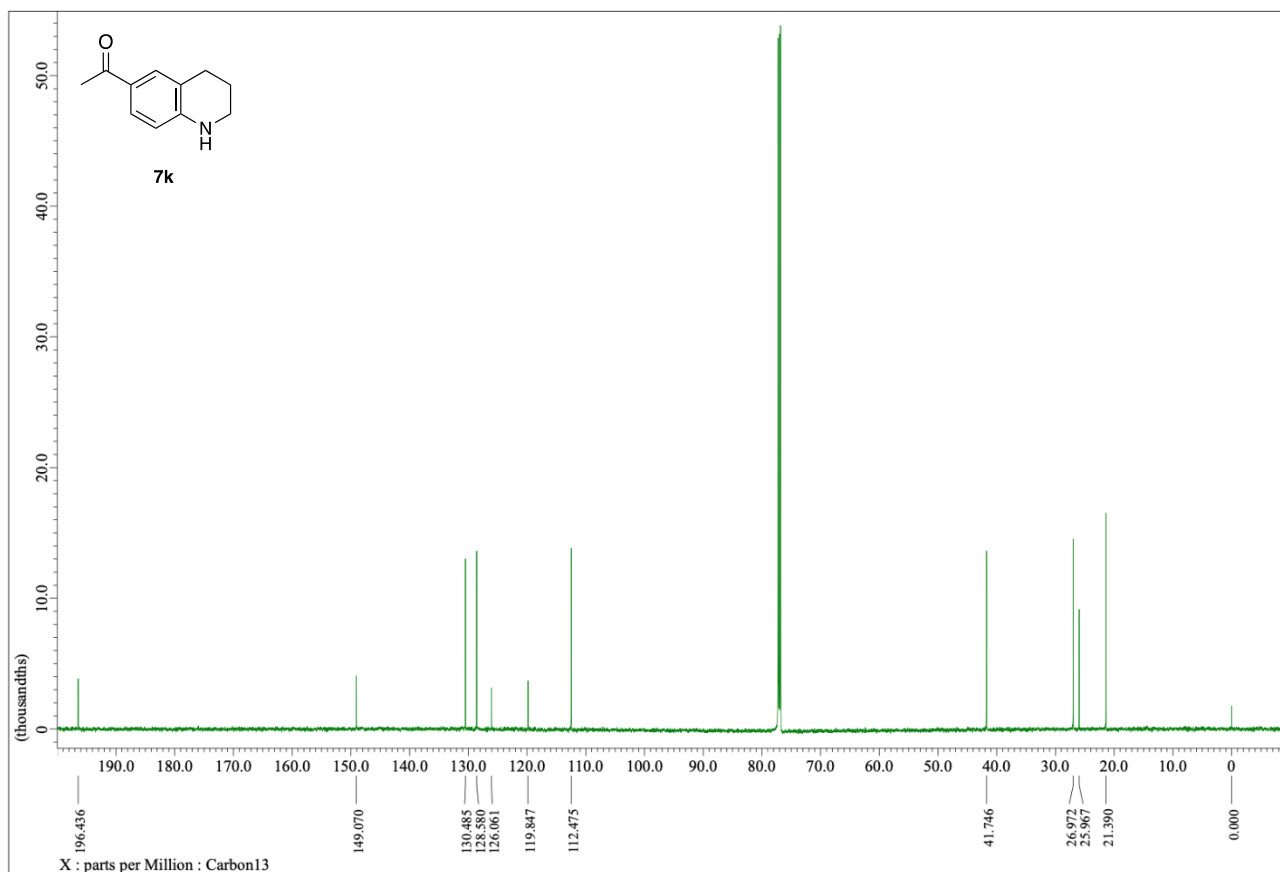

**Methyl 1,2,3,4-tetrahydroquinoline-6-carboxylate (7l)  $^1\text{H}$  NMR (600 MHz,  $\text{CDCl}_3$ )**

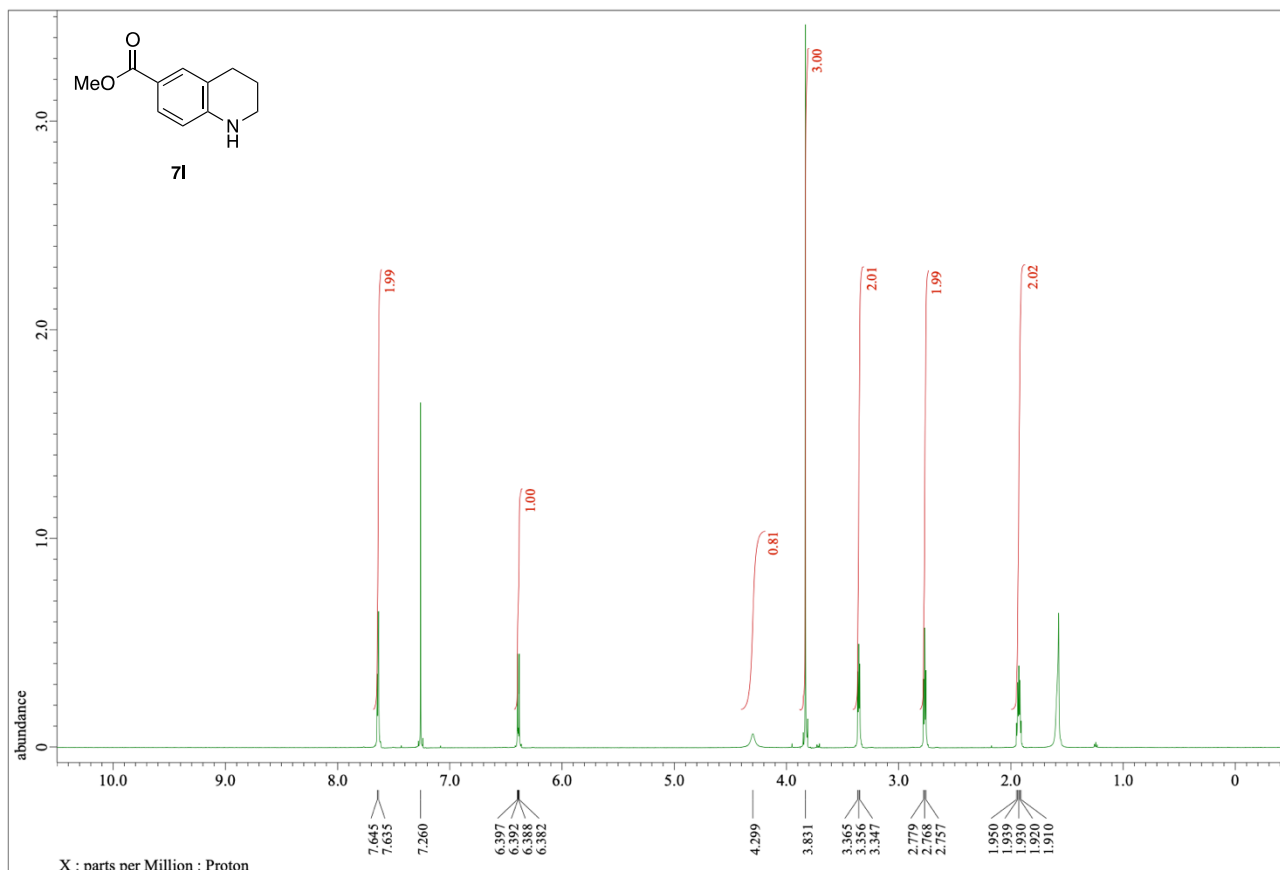

**Methyl 1,2,3,4-tetrahydroquinoline-6-carboxylate (7l)  $^{13}\text{C}$   $\{^1\text{H}\}$  NMR (150 MHz,  $\text{CDCl}_3$ )**

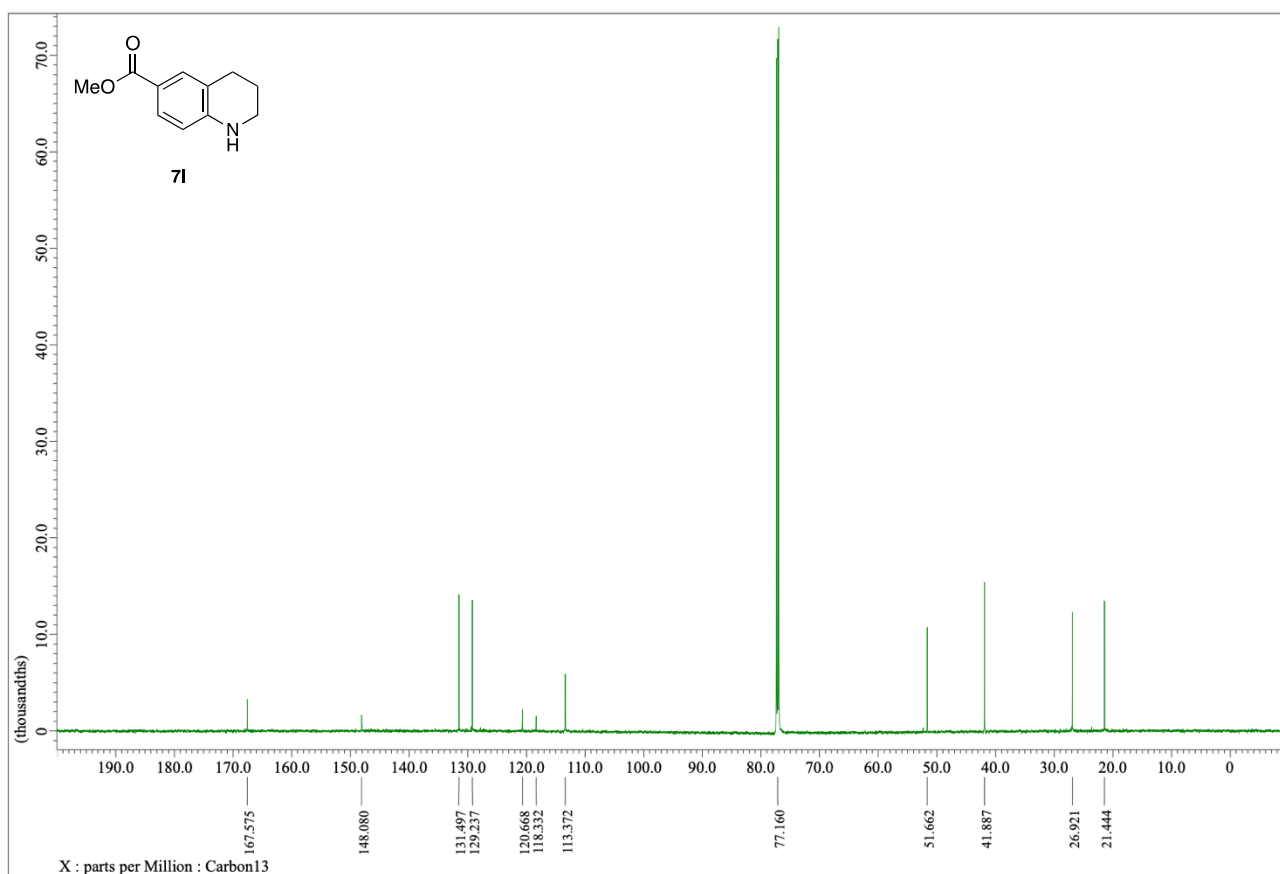

**1,2,3,4-Tetrahydroquinoline-6-carboxamide (7m)  $^1\text{H}$  NMR (600 MHz,  $\text{CDCl}_3$ )**

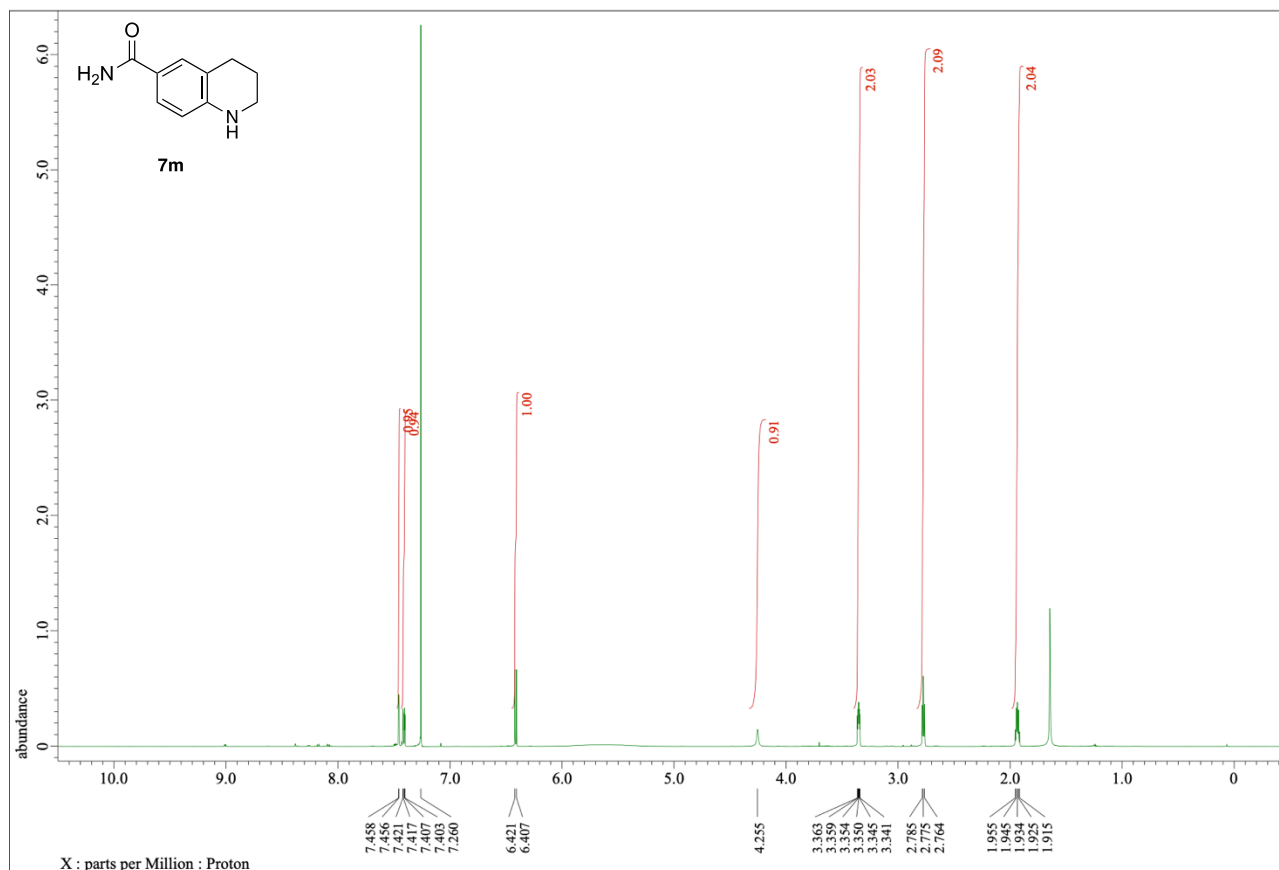

**1,2,3,4-Tetrahydroquinoline-6-carboxamide (7m)  $^{13}\text{C}$   $\{^1\text{H}\}$  NMR (150 MHz,  $\text{CDCl}_3$ )**

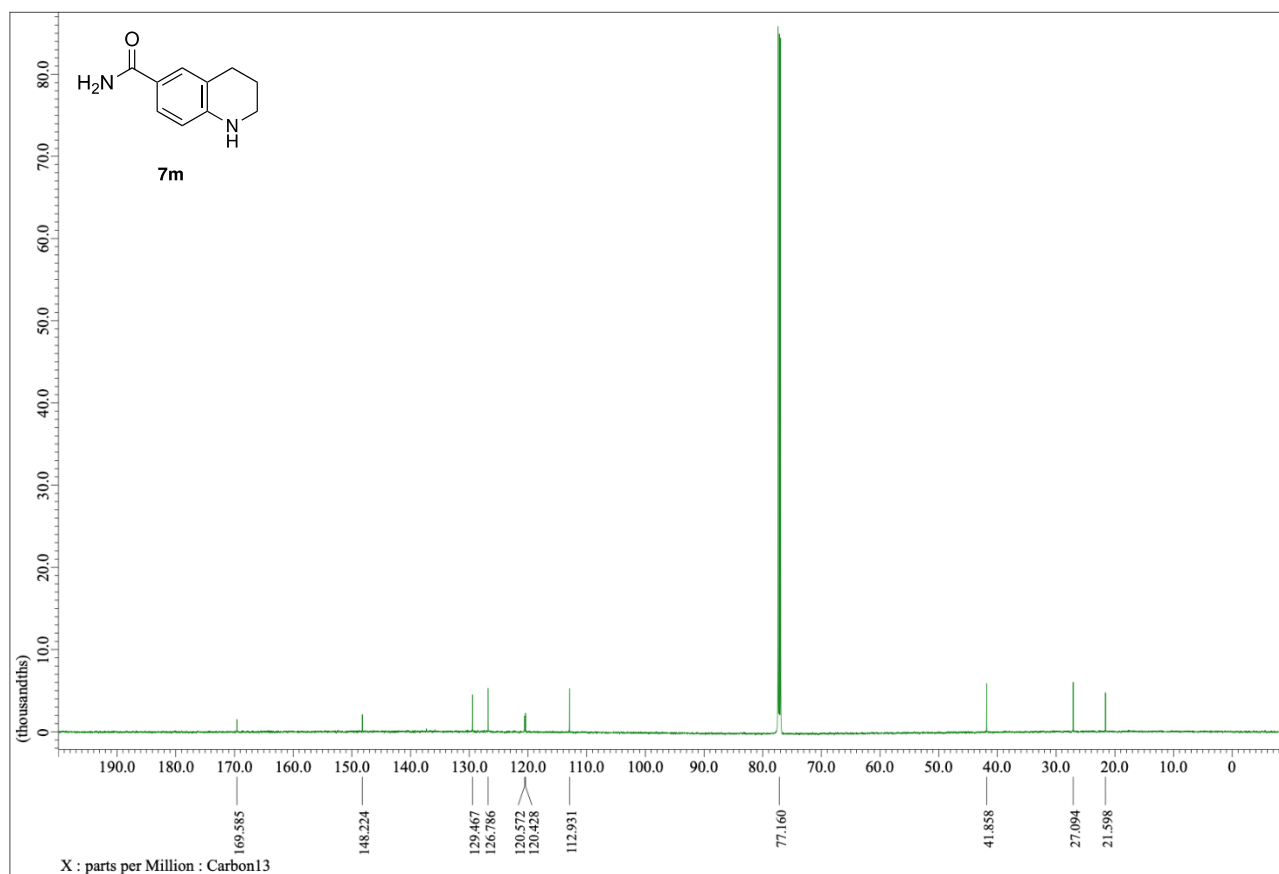

**6-(Trifluoromethyl)-1,2,3,4-tetrahydroquinoline (7n)  $^1\text{H}$  NMR (600 MHz,  $\text{CDCl}_3$ )**

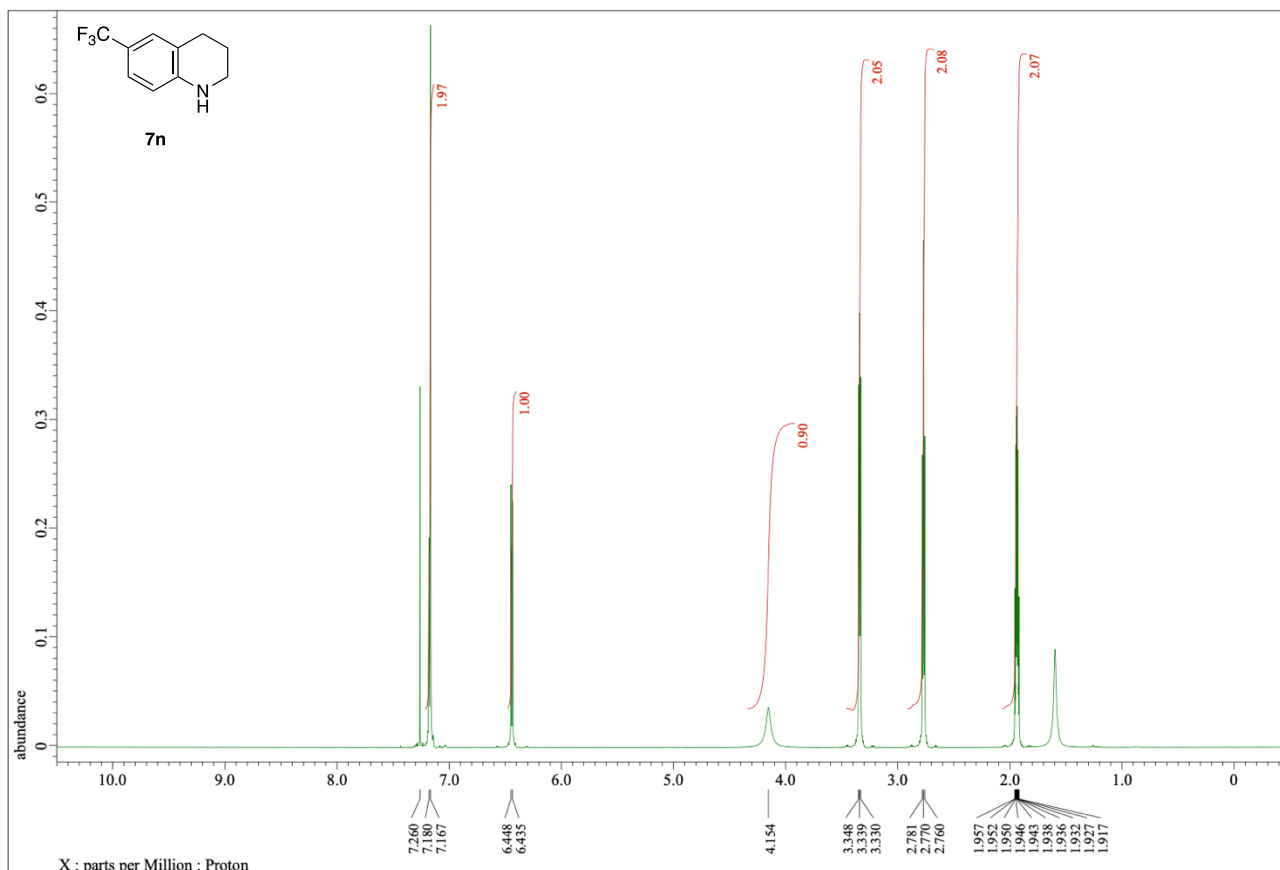

**6-(Trifluoromethyl)-1,2,3,4-tetrahydroquinoline (7n)  $^{13}\text{C}$   $\{^1\text{H}\}$  NMR (150 MHz,  $\text{CDCl}_3$ )**

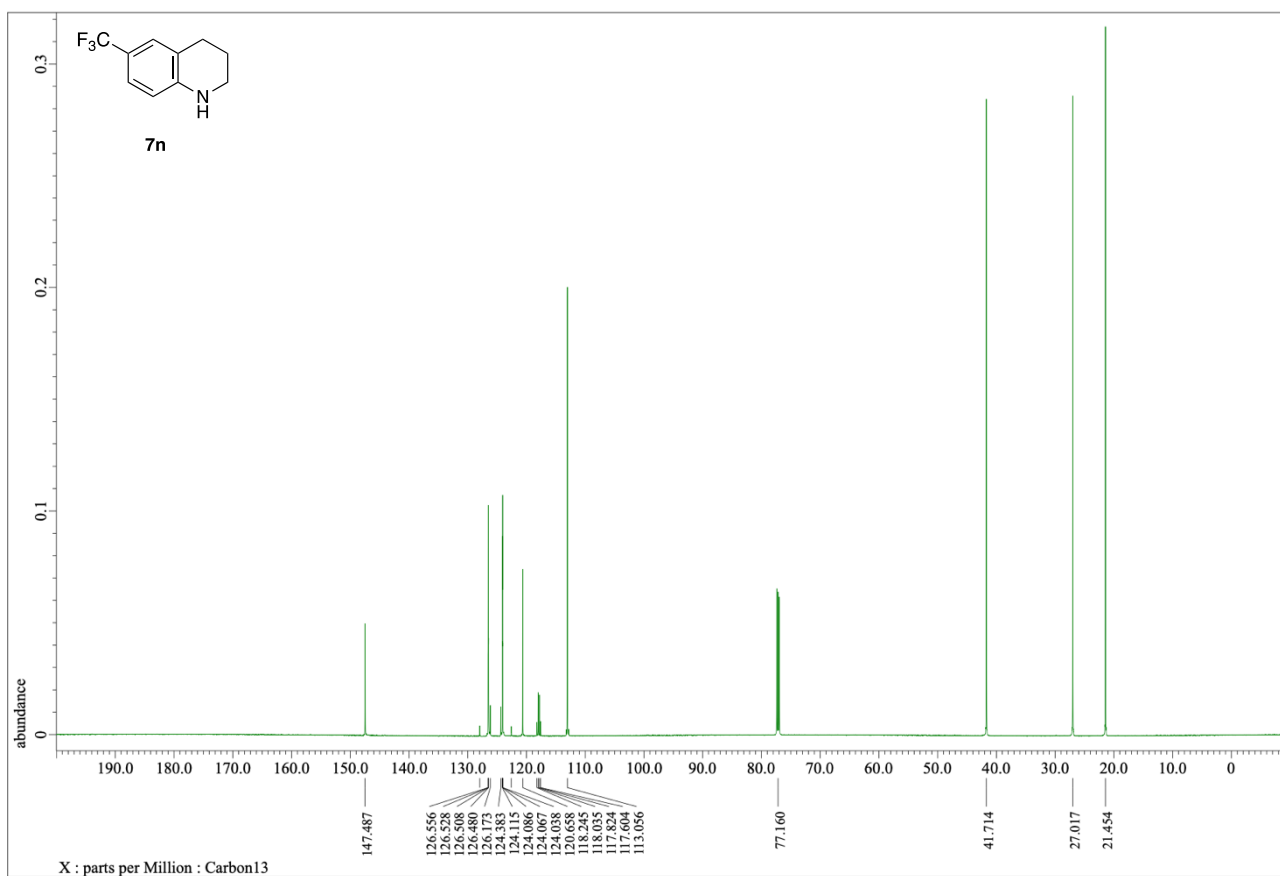

6-(Trifluoromethyl)quinoline (7n)  $^{19}\text{F}$  NMR (565 MHz,  $\text{CDCl}_3$ )

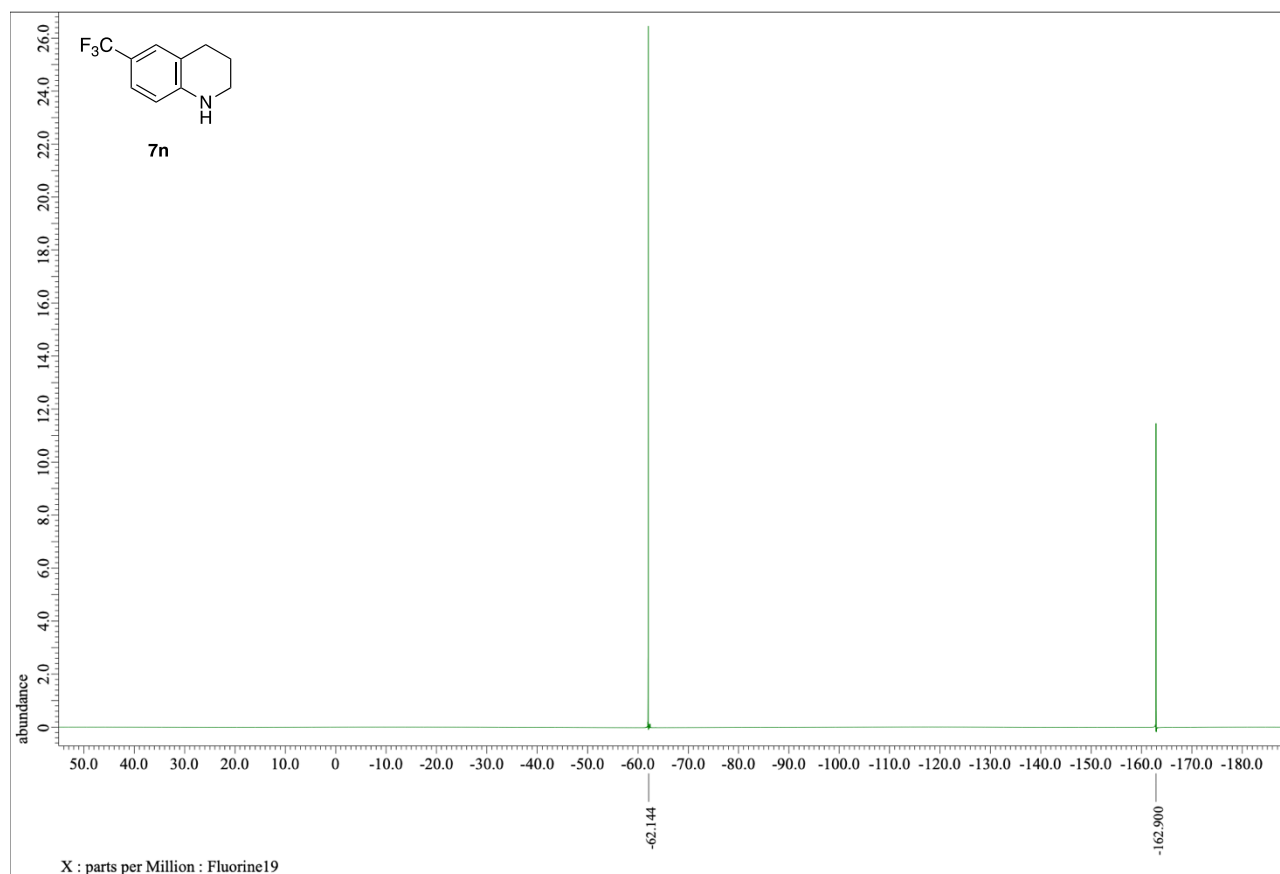

**8-Methoxy-1,2,3,4-tetrahydroquinoline (7o)  $^1\text{H}$  NMR (600 MHz,  $\text{CDCl}_3$ )**

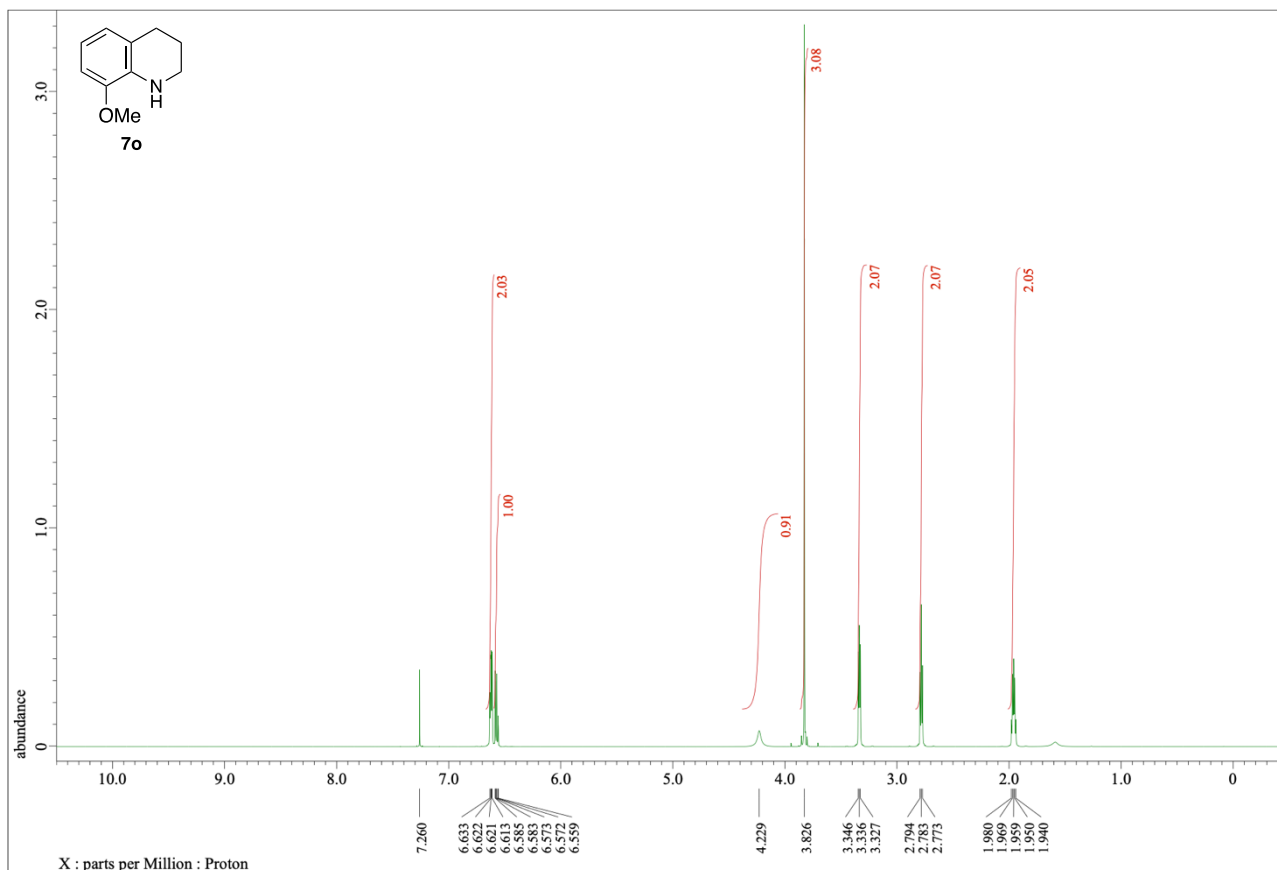

**8-Methoxy-1,2,3,4-tetrahydroquinoline (7o)  $^{13}\text{C}\{^1\text{H}\}$  NMR (150 MHz,  $\text{CDCl}_3$ )**

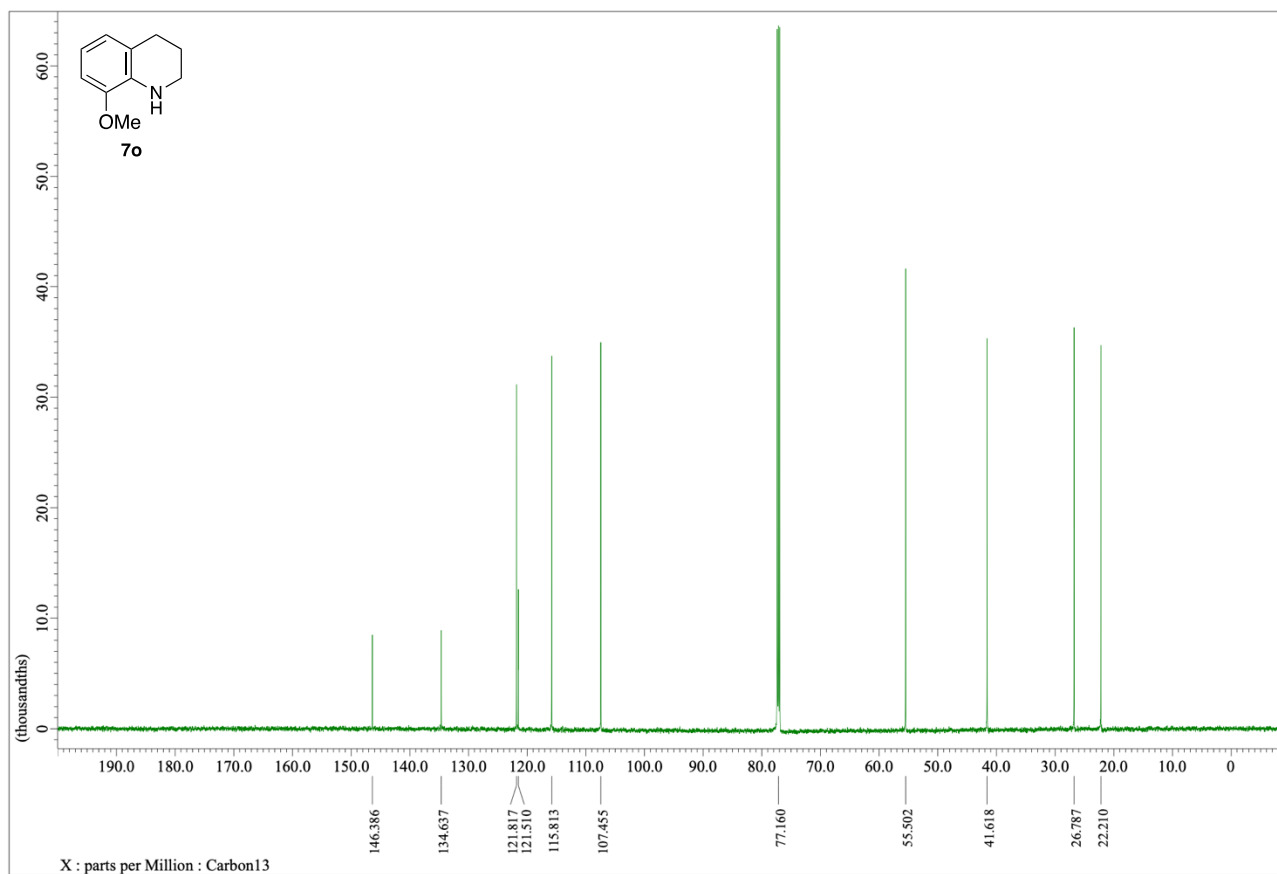

**6-Methoxy-1,2,3,4-tetrahydroquinoline (7p)  $^1\text{H}$  NMR (600 MHz,  $\text{CDCl}_3$ )**

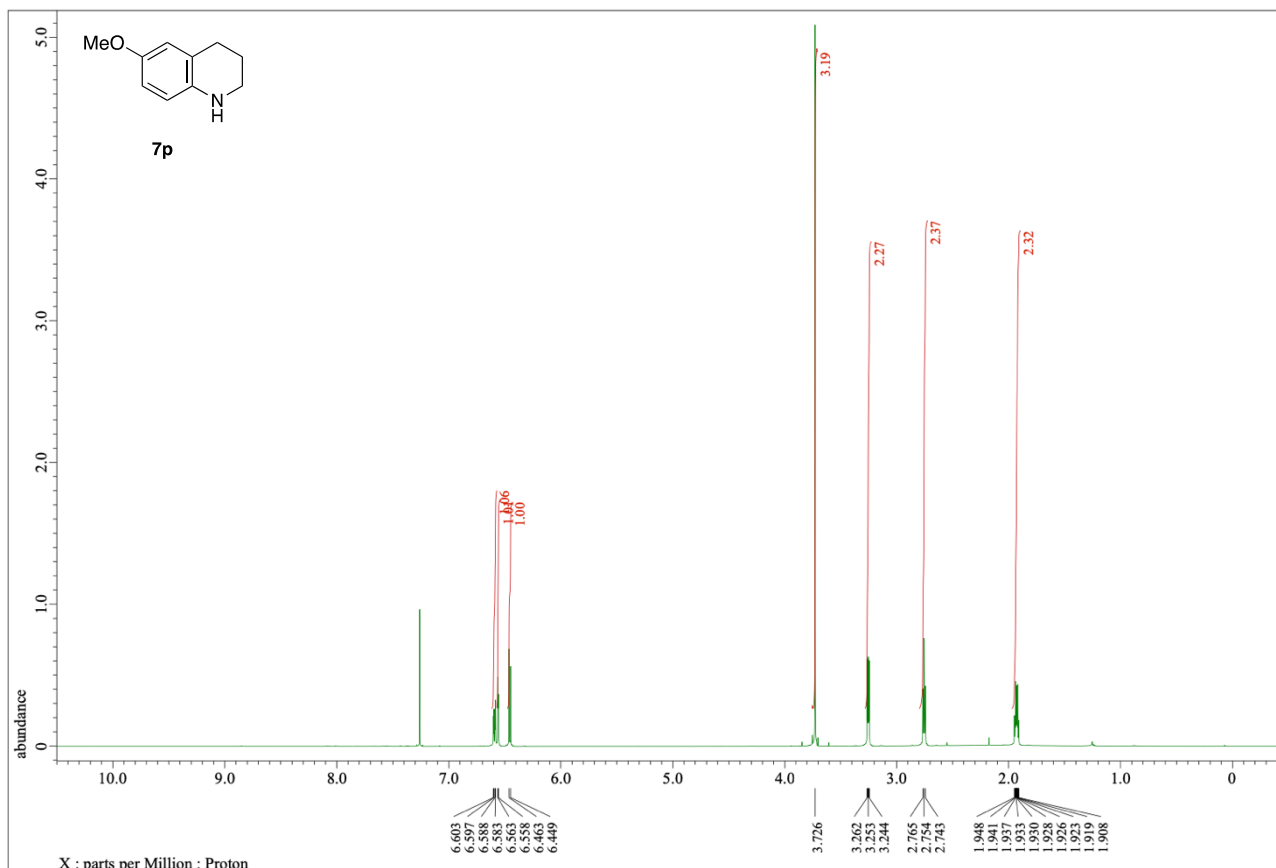

**6-Methoxy-1,2,3,4-tetrahydroquinoline (7p)  $^{13}\text{C}\{^1\text{H}\}$  NMR (150 MHz,  $\text{CDCl}_3$ )**

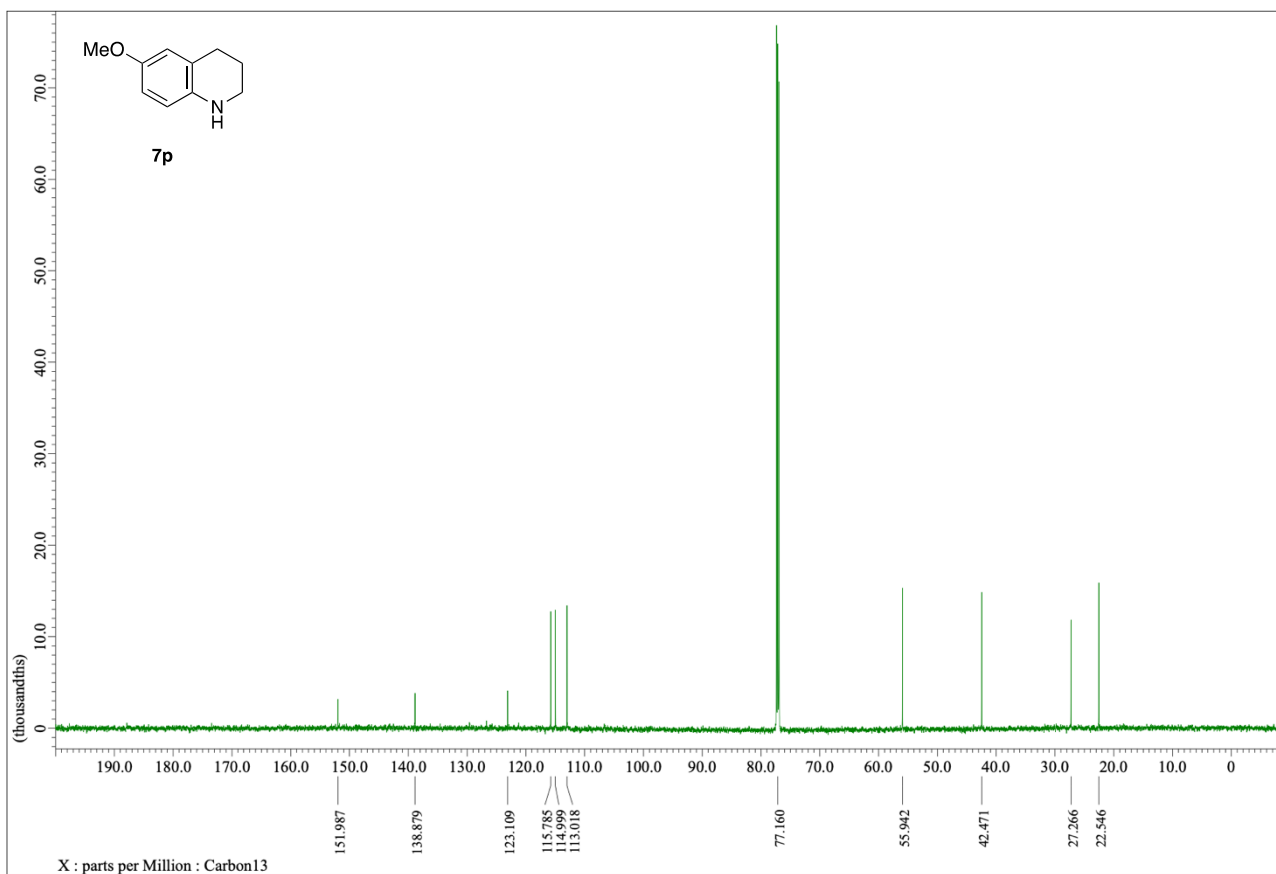

**3-Methoxy-1,2,3,4-tetrahydroquinoline (7q)  $^1\text{H}$  NMR (600 MHz,  $\text{CDCl}_3$ )**

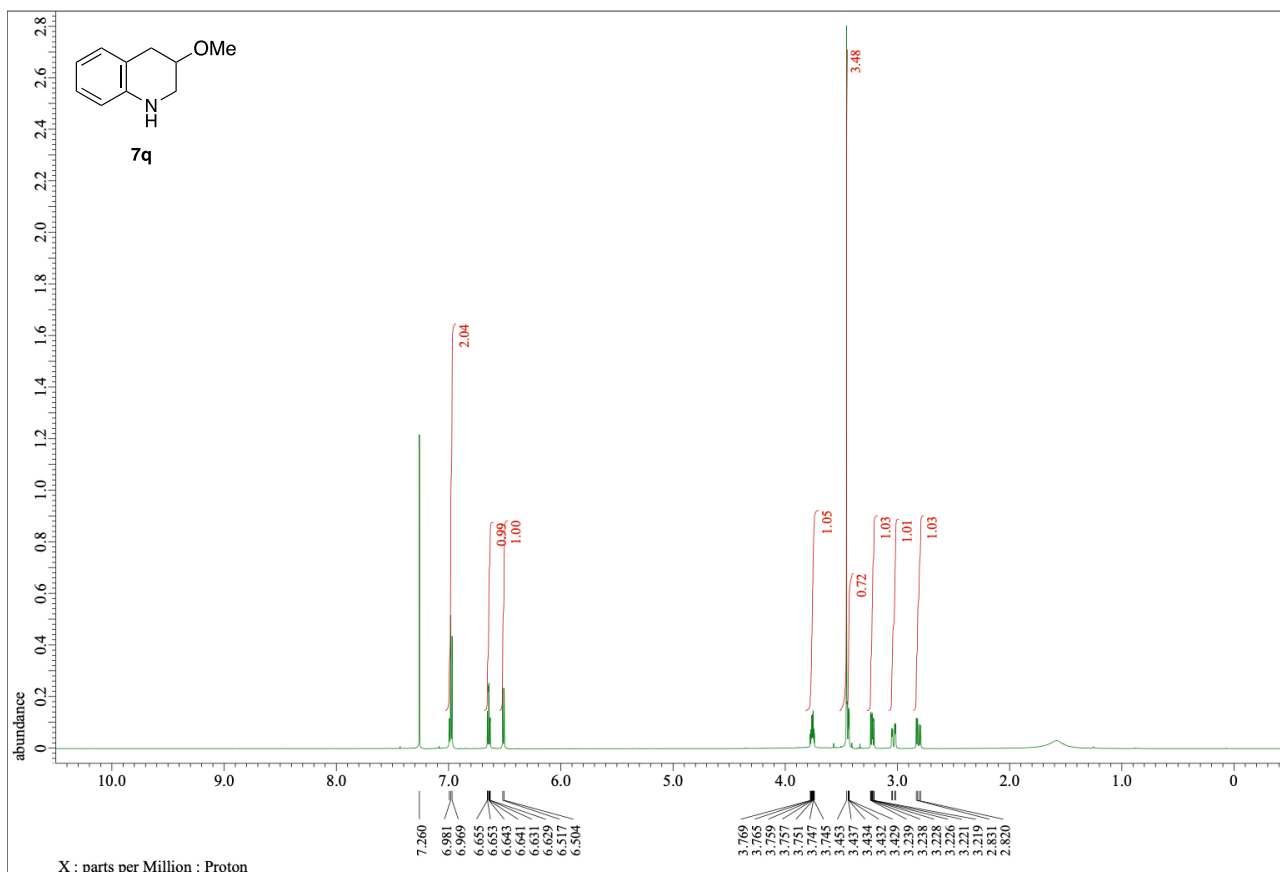

**3-Methoxy-1,2,3,4-tetrahydroquinoline (7q)  $^{13}\text{C}\{^1\text{H}\}$  NMR (150 MHz,  $\text{CDCl}_3$ )**

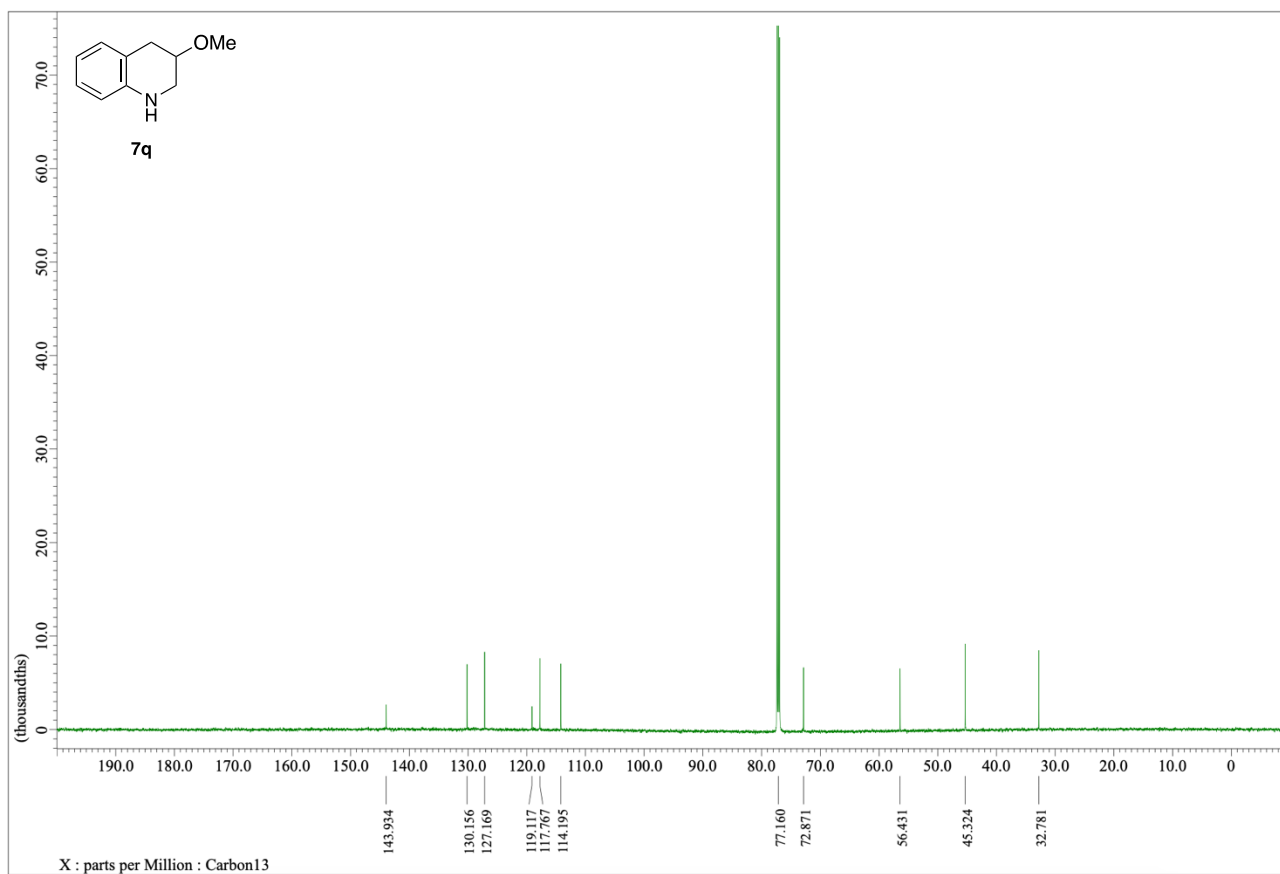

**4-Methoxy-5,6,7,8-tetrahydroquinoline (7r')  $^1\text{H}$  NMR (600 MHz,  $\text{CDCl}_3$ )**

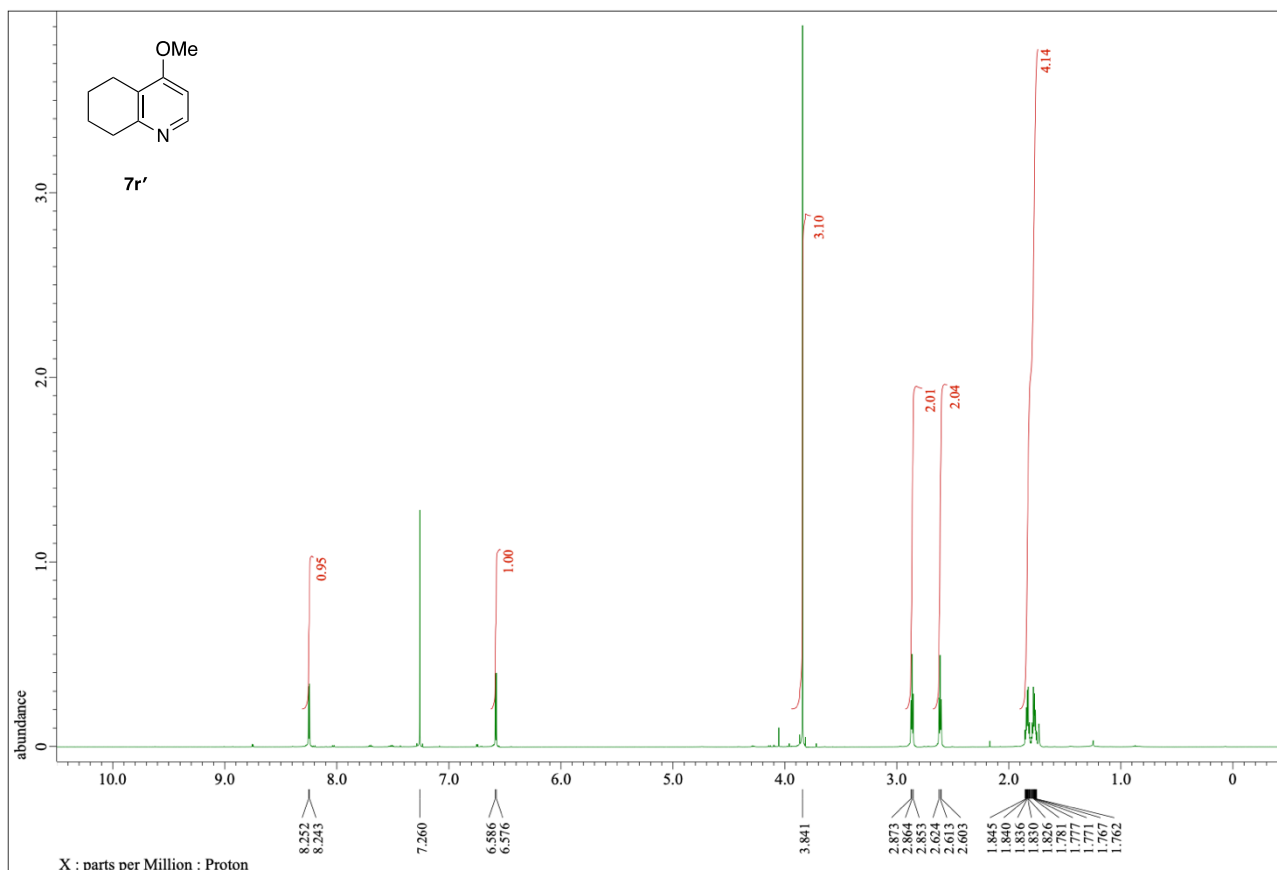

**4-Methoxy-5,6,7,8-tetrahydroquinoline (7r')  $^{13}\text{C}\{^1\text{H}\}$  NMR (150 MHz,  $\text{CDCl}_3$ )**

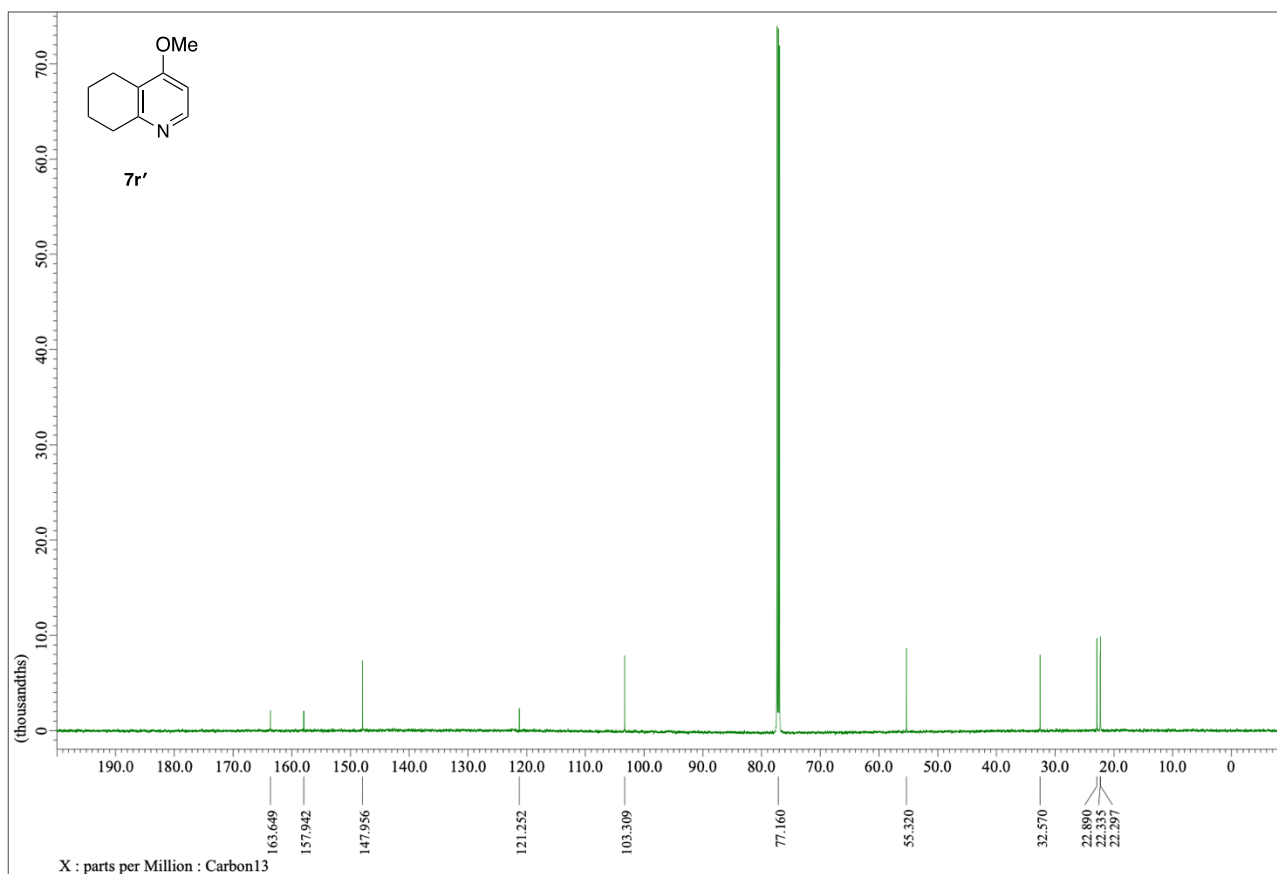

**6-Fluoro-1,2,3,4-tetrahydroquinoline (7s)  $^1\text{H}$  NMR (600 MHz,  $\text{CDCl}_3$ )**

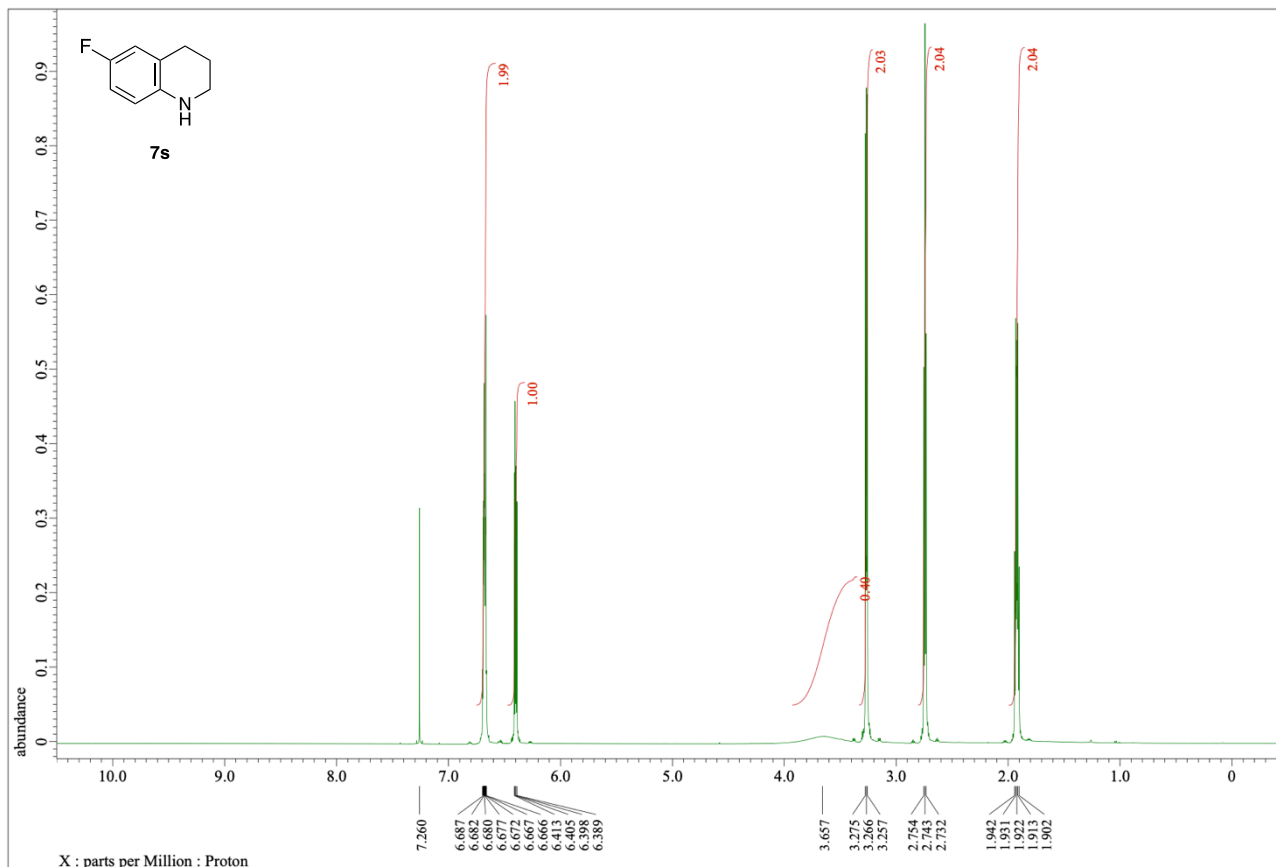

**6-Fluoro-1,2,3,4-tetrahydroquinoline (7s)  $^{13}\text{C}\{^1\text{H}\}$  NMR (150 MHz,  $\text{CDCl}_3$ )**

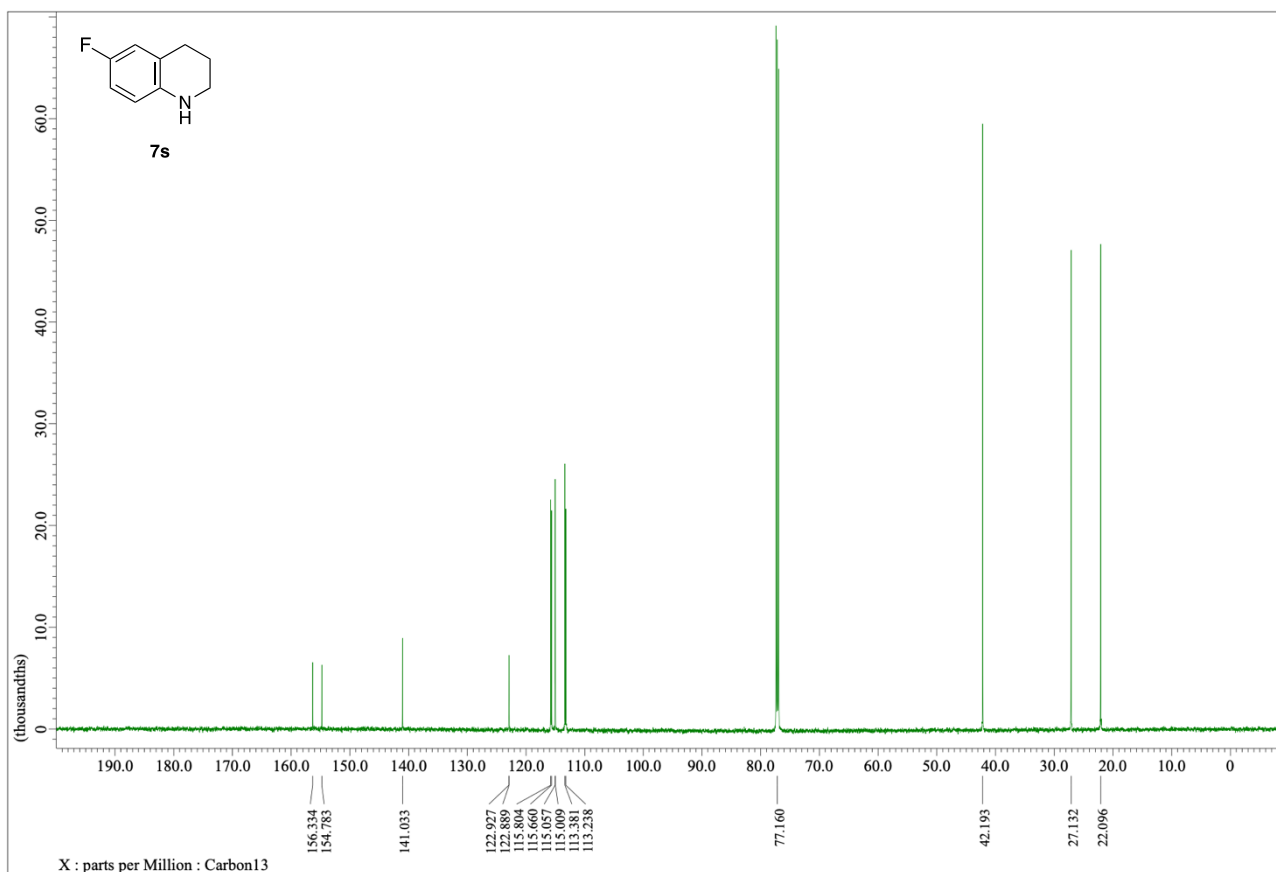

6-Fluoro-1,2,3,4-tetrahydroquinoline (7s)  $^{19}\text{F}\{^1\text{H}\}$  NMR (565 MHz,  $\text{CDCl}_3$ )

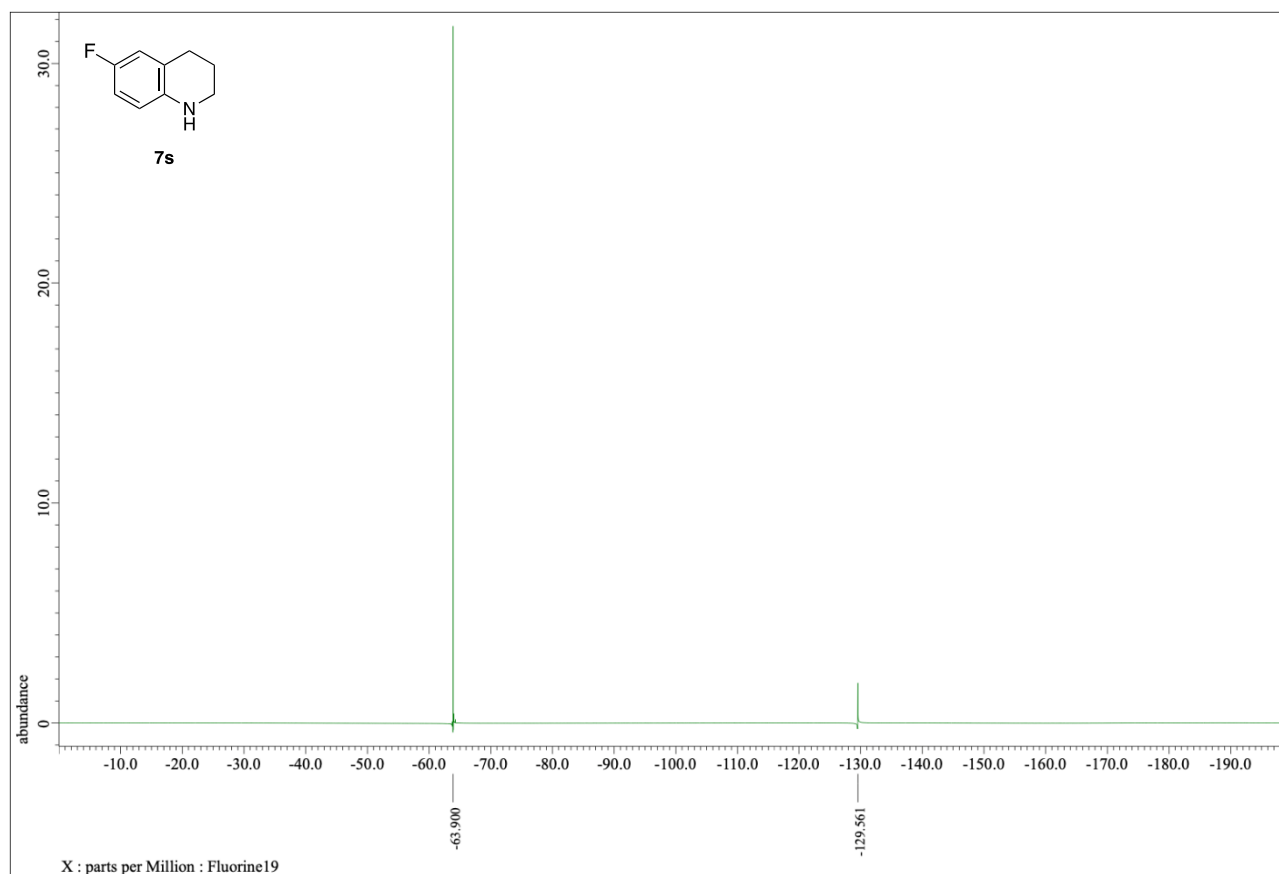

**6-Chloro-1,2,3,4-tetrahydroquinoline (7t)  $^1\text{H}$  NMR (600 MHz,  $\text{CDCl}_3$ )**

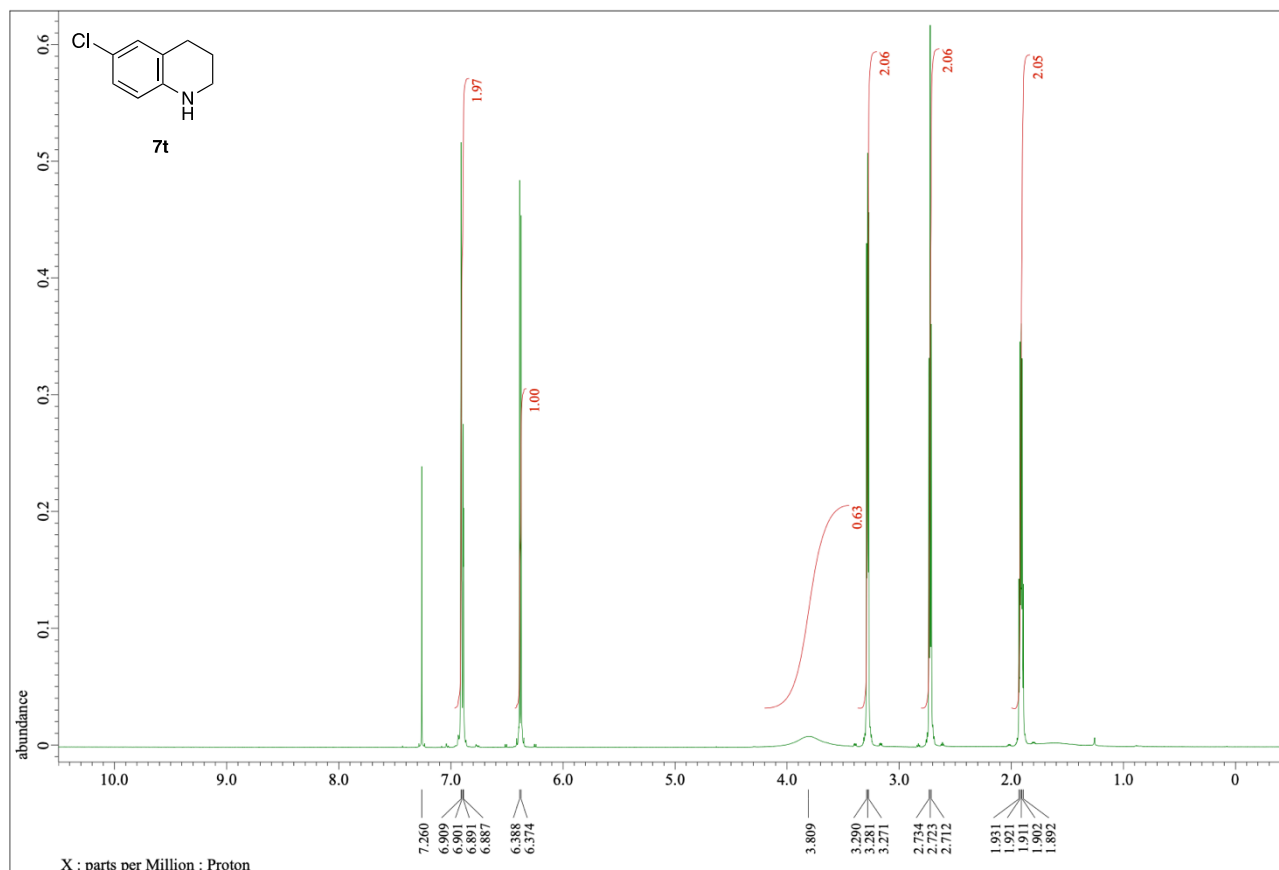

**6-Chloro-1,2,3,4-tetrahydroquinoline (7t)  $^{13}\text{C}\{^1\text{H}\}$  NMR (150 MHz,  $\text{CDCl}_3$ )**

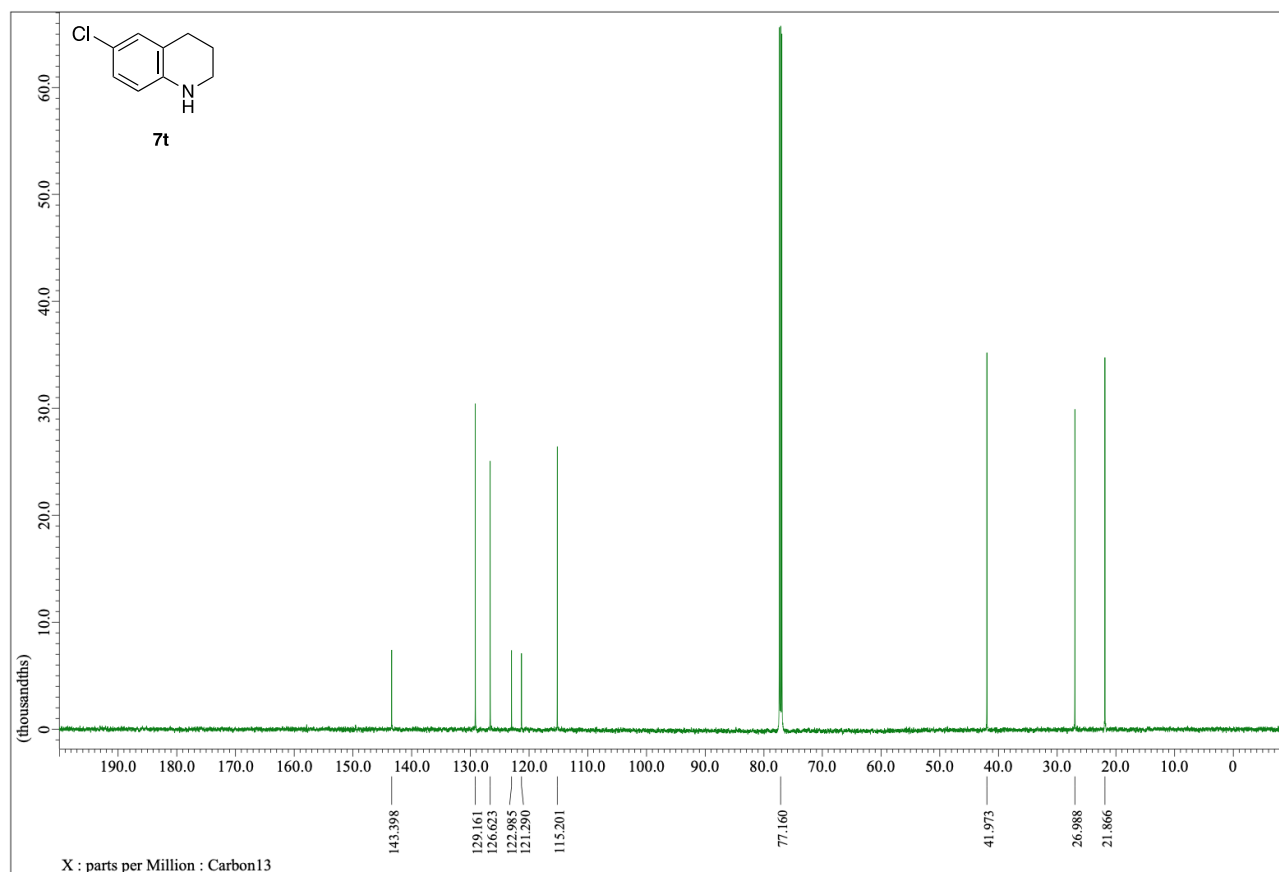

Supplement: Additional file 1 [file 1860-5397-20-139-S1.pdf]
